1 **Cation and anion channelrhodopsins: Sequence motifs and taxonomic**  
2 **distribution**

3 Elena G. Govorunova<sup>1</sup>, Oleg A. Sineshchekov<sup>1</sup>, Hai Li<sup>1</sup>, Yumei Wang<sup>1</sup>, Leonid S. Brown<sup>2</sup>, Alyssa  
4 Palmateer<sup>2</sup>, Michael Melkonian<sup>3</sup>, Shifeng Cheng<sup>4</sup>, Eric Carpenter<sup>5</sup>, Jordan Patterson<sup>5</sup>, Gane K.-S.  
5 Wong<sup>5,6</sup>, and John L. Spudich<sup>1#</sup>

6 <sup>1</sup>Center for Membrane Biology, Department of Biochemistry & Molecular Biology, The  
7 University of Texas Health Science Center at Houston McGovern Medical School, Houston,  
8 Texas, USA

9 <sup>2</sup>Department of Physics and Biophysics Interdepartmental Group, University of Guelph, Guelph,  
10 Ontario, Canada

11 <sup>3</sup>Max Planck Institute for Plant Breeding Research, Integrative Bioinformatics, Cologne,  
12 Germany

13 <sup>4</sup>Agricultural Genomics Institute at Shenzhen, Chinese Academy of Agricultural Sciences,  
14 Shenzhen, China

15 <sup>5</sup>Departments of Biological Sciences and of Medicine, University of Alberta, Edmonton, Alberta,  
16 Canada

17 <sup>6</sup>Beijing Genomics Institute-Shenzhen, Shenzhen, China

18 Running title: Cation and anion channelrhodopsins

19 #Address correspondence to John L. Spudich, [john.l.spudich@uth.tmc.edu](mailto:john.l.spudich@uth.tmc.edu).

20 Word count Abstract: 227

21 Word count Text: 4,360

22

## 23 ABSTRACT

24 Cation and anion channelrhodopsins (CCRs and ACRs, respectively) primarily from two algal  
25 species, *Chlamydomonas reinhardtii* and *Guillardia theta*, have become widely used as  
26 optogenetic tools to control cell membrane potential with light. We mined algal and other  
27 protist polynucleotide sequencing projects and metagenomic samples to identify 75  
28 channelrhodopsin homologs from three channelrhodopsin families, including one revealed in  
29 dinoflagellates in this study. We carried out electrophysiological analysis of 33 natural  
30 channelrhodopsin variants from different phylogenetic lineages and 10 metagenomic homologs  
31 in search of sequence determinants of ion selectivity, photocurrent desensitization, and  
32 spectral tuning in channelrhodopsins. Our results show that association of a reduced number of  
33 glutamates near the conductance path with anion selectivity depends on a wider protein  
34 context, because prasinophyte homologs with the identical glutamate pattern as in cryptophyte  
35 ACRs are cation-selective. Desensitization is also broadly context-dependent, as in one branch  
36 of stramenopile ACRs and their metagenomic homologs its extent roughly correlates with  
37 phylogenetic relationship of their sequences. Regarding spectral tuning, two prasinophyte CCRs  
38 exhibit red-shifted spectra to 585 nm, although their retinal-binding pockets do not match  
39 those of previously known similarly red-shifted channelrhodopsins. In cryptophyte ACRs we  
40 identified three specific residue positions in the retinal-binding pocket that define the  
41 wavelength of their spectral maxima. Lastly, we found that dinoflagellate rhodopsins with a TCP  
42 motif in the third transmembrane helix and a metagenomic homolog exhibit channel activity.

## 43 IMPORTANCE

44 Channelrhodopsins are widely used in neuroscience and cardiology as research tools and are  
45 considered as prospective therapeutics, but their natural diversity and mechanisms remain  
46 poorly characterized. Genomic and metagenomic sequencing projects are producing an ever-  
47 increasing wealth of data, whereas biophysical characterization of the encoded proteins lags  
48 behind. In this study we used manual and automated patch clamp recording of representative  
49 members of four channelrhodopsin families including a family that we report in this study in  
50 dinoflagellates. Our results contribute to a better understanding of molecular determinants of  
51 ionic selectivity, photocurrent desensitization, and spectral tuning in channelrhodopsins.

## 52 INTRODUCTION

53 Channelrhodopsins (ChRs) are light-gated ion channels initially discovered in chlorophyte algae,  
54 in which they serve as photoreceptors guiding phototactic orientation (1-3). Subsequently, ChRs  
55 have also been found in the genomes/transcriptomes of cryptophyte and haptophyte algae (4,  
56 5), the heterotrophic protists known as Labyrinthulea (5) and giant viruses that infect marine  
57 microorganisms (6, 7). Ongoing polynucleotide sequencing projects provide a rich hunting  
58 ground for further exploration of ChR diversity and taxonomic distribution.

59 Functionally, ChRs are divided into cation and anion channelrhodopsins (CCRs and ACRs,  
60 respectively) (8). Both ChR classes serve for photocontrol of excitable cells, such as neurons and  
61 cardiomyocytes, via a biotechnique known as optogenetics (9, 10). However, structural  
62 determinants for cation and anion selectivity in ChRs remain poorly understood. X-ray crystal  
63 structures (11-15) indicate that the ion conductance path in algal ChRs is formed by  
64 transmembrane helices (TM) 1, 2, 3 and 7. All so far known ACRs contain a non-carboxylate  
65 residue in the position of the protonated Schiff base counterion in bacteriorhodopsin (Asp85),  
66 whereas in nearly all CCRs this carboxylate is conserved. However, this sequence feature cannot  
67 be regarded as a sole indicator of anion selectivity, because some chlorophyte CCRs also show a  
68 non-carboxylate residue in the counterion position (e.g. *DsChR1* from *Dunaliella salina* (16)).

69 Most chlorophyte CCRs contain five Glu residues in TM2 and the TM2-TM3 loop (Glu82, Glu83,  
70 Glu90, Glu97, and Glu101 in ChR2 from *Chlamydomonas reinhardtii*, *CrChR2*), whereas in all so  
71 far known ACRs most or even all of the corresponding positions are occupied with non-  
72 carboxylate residues. Therefore, it has been proposed that negative electrostatic potential of  
73 the channel pore defines cation selectivity (17, 18). Indeed, mutagenetic remodeling of the  
74 pore to reduce electronegativity yielded permeability for anions in chlorophyte CCRs (17-21).  
75 Yet, some of the TM2 glutamates are conserved in ACRs and apparently do not interfere with  
76 their anion conductance.

77 Other biophysical properties of ChRs relevant for optogenetic applications are their  
78 desensitization under continuous or pulsed illumination (also called “inactivation” in the  
79 literature) and spectral sensitivity. In an earlier study, a group of ACRs discovered in the TARA  
80 marine transcriptomes demonstrated particularly rapid and strong desensitization (22). As their  
81 source organisms were not known, these proteins were named MerMAIDs (Metagenomically  
82 discovered, Marine, Anion-conducting and Intensely Desensitizing channelrhodopsins).  
83 However, strong desensitization cannot serve as a characteristic of a single ChR family, because  
84 it was also observed in some “bacteriorhodopsin-like” CCRs (BCCRs) from cryptophytes that  
85 show very little sequence homology with MerMAIDs (23).

86 To gain more insight into the taxonomic distribution and structure-function relationships of  
87 ChRs, we identified 75 ChR homologs from several phylogenetic lineages and metagenomic  
88 samples, and tested 27 of them along with 16 previously reported sequences by heterologous  
89 expression in cultured mammalian cells followed by patch clamp recording. We show that the  
90 same pattern of conserved Glu residues may accompany cation or anion conductance in ChRs  
91 from different taxa, and that the degree of desensitization in MerMAID homologs is the greater,  
92 the closer their sequences are to those of the first reported MerMAIDs. We report two  
93 prasinophyte CCRs with red-shifted spectra and confirm that three specific residues in the  
94 retinal-binding pocket are responsible for wavelength regulation in cryptophyte ACRs. Finally,  
95 we demonstrate that some dinoflagellate rhodopsins possess channel activity.

96 RESULTS

97 *Prasinophyte CCRs*

98 Only a few of >150 so far identified chlorophyte ChRs (Fig. 1, and Data Sets S1 and S2) have  
99 been tested by heterologous expression. Both *C. reinhardtii* ChRs conduct cations (2, 3), so  
100 other chlorophyte ChRs were also assumed to be CCRs. However, a recent study has  
101 demonstrated that two ChRs from the prasinophyte genus *Pyramimonas* in fact conduct anions  
102 (6), which called for a more detailed functional analysis of chlorophyte ChRs.

103 Three ChR homologs derived from the prasinophytes *Crustomastix stigmatica*, *Mantoniella*  
104 *squamata* and *Pyramimonas melkonianii* (6) exhibit a residue pattern typical of cryptophyte  
105 ACRs, i.e. they display conserved Glu82 and Glu90 with non-carboxylate residues in the  
106 positions of Glu83, Glu97, Glu101 and Glu123 of CrChR2 (Fig. 2A). In a *Cymbomonas*  
107 *tetramitiformis* sequence (6), Glu90 and Glu97 are conserved, whereas Glu82 is replaced with  
108 Gln (Fig. 2A). We synthesized mammalian codon-adapted versions of these rhodopsin domains,  
109 fused them with C-terminal enhanced yellow fluorescent protein (EYFP), expressed in HEK293  
110 (human embryonic kidney) cells and analyzed by manual whole-cell patch clamp.

111 Three of these ChRs generated photocurrents (Fig. 2B and C) in our standard buffer system (for  
112 solution compositions see Table S1), whereas the homolog from *P. melkonianii* that we named  
113 *PymeChR* was non-electrogenic. The action spectra of photocurrents generated by the *M.*  
114 *squamata* and *C. stigmatica* homologs were red-shifted (the rhodopsin maxima at ~580 and  
115 585 nm, respectively; Fig. 2D). Their retinal-binding pockets are nearly identical, but differ from  
116 those of previously known red-shifted ChRs (Fig. S1A). Both spectra exhibited a second band at  
117 ~520 nm that reflected a Förster resonance energy transfer (FRET) from EYFP to rhodopsin, as  
118 was earlier shown in RubyACRs from *Labyrinthulea* (5). The efficiency of FRET was even greater  
119 in the homolog from *C. stigmatica*, the rhodopsin peak of which was observed in the green  
120 spectral region and could not be accurately resolved because of the FRET contribution (Fig. 2D,  
121 olive line).

122 To test the relative permeability of the prasinophyte homologs for H<sup>+</sup>, Na<sup>+</sup> and Cl<sup>-</sup> we varied the  
123 concentration of each of these ions in the bath (for solution compositions see Table S1),  
124 measured the current-voltage relationships and determined the reversal potentials (E<sub>rev</sub>).  
125 CrChR2 was included in this experiment for comparison. Fig. 2E shows that under all tested  
126 conditions E<sub>rev</sub> for all three homologs was close to the equilibrium potential of H<sup>+</sup>, indicating  
127 that they are H<sup>+</sup>-selective channels with negligible permeability for Na<sup>+</sup> and Cl<sup>-</sup>. We named them  
128 CtCCR, MsCCR, and CsCCR. A less positive E<sub>rev</sub> of MsCCR photocurrents probed under the H<sup>+</sup>  
129 gradient does not result from the permeability for Na<sup>+</sup> as it does in CrChR2, and most likely  
130 reflects a contribution of intramolecular charge transfers, as previously found in other CCRs  
131 (24).

132 Four sequences from Chlorophyceae have only the Glu82 homolog, as do prasinophyte ACRs  
133 (Fig. S1B), but show no close sequence homology to them. Four sequences from

134 Chlorodendrophyceae contain no glutamate residues in any of the six analyzed positions (Fig.  
135 S1D) and form a separate branch on the phylogenetic tree (Fig. 1). Very unusually, in the latter  
136 sequence group the Asp residue corresponding to Asp212 of bacteriorhodopsin is located not  
137 four residues upstream, as in most known microbial rhodopsins, but three residues upstream of  
138 the Schiff base lysine (Fig. S1E). None of these eight proteins, nor a ChR homolog from the  
139 streptophyte *Coleochaete* generated channel currents (see Supplemental Text and Fig. S1C for  
140 details).

#### 141 *Stramenopile ACRs and their metagenomic homologs*

142 The first MerMAIDs reported were seven homologous ACRs identified in metagenomic samples  
143 (22). Recently, close homologs were found in unclassified stramenopile species (5, 25), which  
144 suggests that the original MerMAIDs also originate from stramenopiles. We have identified 20  
145 additional MerMAID homologs, nine haptophyte ACR homologs and two Labyrinthulea ACR  
146 homologs (Data Set S1) in metagenomic databases (Data Set S4). We tested EYFP fusions of five  
147 metagenomic MerMAID homologs (abbreviated by the lower case “mg” in the protein name),  
148 two closely related sequences from the unclassified stramenopile strain TOSAG23-3  
149 (abbreviated by “sT” (5)), and three sequences from the bicosoecid stramenopile *Cafeteria*  
150 *roenbergensis* (abbreviated by “Car” to distinguish them from *C. reinhardtii* ChRs). In most  
151 sequences of this group both Glu82 and Glu90 (*CrChR2* numbering) are conserved, as in the  
152 previously known cryptophyte ACRs and MerMAIDs (Fig. 3A). The five tested MerMAID  
153 homologs and those from TOSAG23-3 clustered together with the first reported MerMAIDs (Fig.  
154 S2), whereas *Cafeteria* homologs formed a separate branch related to haptophyte ACRs (Fig. 1).  
155 Each of these homologs generated photocurrents in HEK293 cells (Fig. 3B). As shown below,  
156 these ChRs conduct anions, so we designated them ACRs.

157 Out of all tested homologs, sTACR2 is the most closely related to the first reported MerMAIDs,  
158 which exhibit nearly complete desensitization (Fig. S2). Similarly, sTACR2 photocurrents showed  
159 nearly complete desensitization (Fig. 3C, cyan), whereas photocurrents from sTACR1, the most  
160 distant homolog (Fig. S2), exhibited only ~40% desensitization (Fig. 3C, dark yellow). The values  
161 for other homologs were intermediate (Fig. 3C). All ChRs of this group demonstrated exclusively  
162 anion permeability (Fig. 3D). The action spectra of their photocurrents are shown in Fig. 3E and  
163 F. The shape of some spectra (e.g. mgACR2 and mgACR5) indicated a contribution of FRET from  
164 EYFP.

#### 165 *Cryptophyte ACRs*

166 Cryptophytes are the taxon in which the first natural ACRs were discovered (4). To explore the  
167 diversity of cryptophyte ACRs further, we have analyzed transcriptomes of 20 additional  
168 cryptophyte strains (Table S2) and identified 15 transcripts homologous to previously known  
169 cryptophyte ACRs (Data Set S1). As no species names have been assigned to their source  
170 organisms, we used the numbers 3-8 in the abbreviated protein names to designate different  
171 *Rhodomonas* strains (the numbers 1 and 2 have already been assigned to the previously

172 analyzed strains). The Glu82 homologs is conserved in all, and the Glu90 homolog, in most of  
173 these proteins, whereas all other analyzed positions are occupied with non-carboxylate  
174 residues (Fig. 4A). Thirteen homologs generated photocurrents upon expression in HEK293 cells  
175 (Fig. 4B and C).

176 To verify permeability for anions in the three cryptophyte ACR homologs that were well-  
177 expressed and generated photocurrents in the nA range by manual patch clamp (Fig. 4B), we  
178 used a high-throughput automated patch clamp (APC) instrument, SyncroPatch 384i, with  
179 solutions provided by the manufacturer (for their full compositions see Table S1). The internal  
180 solution was predominantly CsF to promote formation of gigaseals, and the external solution  
181 was predominantly NaCl. Representative series of photocurrent traces recorded from *R3ACR1*  
182 under incremental voltage using the SyncroPatch 384i and AxoPatch 200B with the same  
183 solutions are shown in Figs. 4D and E. *GtACR1* and *CrChR2*, well-characterized by manual patch  
184 clamp, were included in the SyncroPatch experiment as ACR and CCR controls, respectively.  
185 With the SyncroPatch solutions, the  $E_{rev}$  of *GtACR1* photocurrents was negative, whereas that  
186 of *CrChR2* was positive (Fig. 4D). In all tested homologs the  $E_{rev}$  was close to that of *GtACR1* (Fig.  
187 4D), which confirmed their anion selectivity.

188 Previously, we and others demonstrated that Cys133, Ser156 and Tyr207 in *GtACR1* (absorption  
189 maximum 515 nm) corresponding to Arg129, Gly152 and Phe203 in *GtACR2* (absorption  
190 maximum 470 nm) define the spectral difference between these two proteins (15, 26)(E.G.  
191 Govorunova, O.A. Sineshchekov and J.L. Spudich, manuscript in preparation). According to  
192 *GtACR1* crystal structures, the side chains of Cys133 and Ser156 are located near the  $\beta$ -ionone  
193 ring of the chromophore (Fig. 5A), whereas the hydroxyl group of Tyr207 forms a hydrogen  
194 bond with Asp234 in the photoactive center. Comparative analysis of these positions (Fig. 5C)  
195 and action spectra of photocurrents (Fig. 5B and D) in the 13 functional ACR homologs has  
196 revealed that only those proteins in which the residues match those of *GtACR2* exhibit blue-  
197 shifted absorption maxima. When Cys or Met are found at position 133, or Ser or Ala at position  
198 156, the spectrum is shifted to longer wavelengths.

### 199 *Dinoflagellate ChRs*

200 Dinoflagellates exhibit genuine phototactic orientation (27-29), and their genomes encode  
201 multiple type I rhodopsins (30-32). However, to the best of our knowledge, none of these  
202 rhodopsins has so far been reported to exhibit channel function. Some rhodopsin sequences  
203 from dinoflagellates of the genera *Ansanella*, *Pelagodinum*, and *Symbiodinium* (6, 33-36)  
204 contain the TCP motif in the middle of TM3 that is conserved in most so far known  
205 channelrhodopsins (Fig. S3A). This motif is also conserved in 17 proteins encoded by the deep-  
206 ocean TARA marine transcriptomes that cluster together with these dinoflagellate rhodopsins  
207 and form a distinct branch of the phylogenetic tree (Fig. 1). A very unusual feature of this entire  
208 sequence cluster is that Asp212 of bacteriorhodopsin, highly conserved in all so far known  
209 channelrhodopsins, is replaced with Asn or, in one homolog, Leu (Fig. S3B).

210 Only one of the five tested metagenomic rhodopsin domains of this group was electrogenically  
211 photoactive upon expression in HEK293 cells, producing photocurrents barely resolved from  
212 the noise level (Fig. 6A, black bar). The fusion protein formed disk-shaped fluorescent  
213 aggregates within the cells (Fig. S3C, top). The addition of the trafficking signal (TS) between  
214 rhodopsin and EYFP, and the endoplasmic reticulum export motif (ER) at the C terminus of the  
215 fusion protein (37) reduced formation of the aggregates (Fig. S3C, bottom) and significantly  
216 increased the photocurrents, although they still reached only ~20-pA level at best (Fig. 6A, blue  
217 bar). In our standard buffer system with nearly symmetrical ionic concentrations in the bath  
218 and pipette the sign of the photocurrents reversed at positive voltages indicating passive ion  
219 transport (Fig. 6B, top). We named this protein *mgdChR1* (for metagenomic dinoflagellate  
220 homolog ChannelRhodopsin 1).

221 A homologous rhodopsin domain from the coral endosymbiont *Symbiodinium microadriaticum*  
222 has a ~300-residue N-terminal extension (Fig. S4), which is much longer than that found in  
223 other known ChRs, including *mgdChR1*. An expression construct encoding residues 1-600  
224 produced no tag fluorescence. However, when the N-terminal extension was deleted, and TS  
225 and ER export motifs added, fluorescence was observed, and passive photocurrents of a  
226 similarly small amplitude as from *mgdChR1* were recorded (Fig. 6B, bottom). We named this  
227 protein  $\Delta$ *SmChR1* to emphasize truncation of the N-terminal extension. A homologous protein  
228  $\Delta$ *SmChR2* from the same organism also generated photocurrents, but their amplitudes were  
229 even smaller. Channel currents from  $\Delta$ *SmChR1*, but not from *mgdChR1*, were preceded with a  
230 fast negative current, the sign of which did not reverse at positive voltages (Fig. 6B, bottom).  
231 Such currents have previously been recorded from several other ChRs and interpreted as  
232 intramolecular charge displacement associated with isomerization of the retinal chromophore  
233 (24). The photocurrent action spectra of *mgdChR1* and  $\Delta$ *SmChR1* peaked in the green spectral  
234 region (Fig. 6C). Small amplitudes of *mgdChR1* and  $\Delta$ *SmChR1* photocurrents make accurate  
235 measurements of the reversal potentials problematic, so we were not able to determine their  
236 ionic selectivity.

## 237 DISCUSSION

238 We report functional testing of 43 ChR homologs from prasinophytes, stramenopiles,  
239 cryptophytes, dinoflagellates and metagenomic samples. An unexpected result is that ACRs  
240 appear to be more widely spread among protist taxa than CCRs. Another unexpected result is  
241 that the same residue pattern comprising conserved Glu82 and Glu90 with non-carboxylate  
242 residues in the positions of Glu83, Glu97, Glu101, and Glu123 (*CrChR2* numbering) found in  
243 most ACRs from stramenopiles, cryptophytes, haptophytes, and metagenomic samples is also  
244 found in the CCRs, *CsCCR* and *MsCCR*, from prasinophytes. Out of five Glu residues in TM2 and  
245 TM2-TM3 loop, Glu82 is most conserved across the entire ChR family. According to our  
246 empirical calculations using PROPKA3 (38), the pK<sub>a</sub> of the Glu82 homolog is acidic in all so far  
247 published X-ray crystal structures of ChRs, including that of *GtACR1* in which it apparently does

248 not prevent anion conductance. In *CrChR2*, replacement of Glu82 with Ala strongly inhibited  
249 expression in mammalian cells judged by the tag fluorescence and correspondingly reduced  
250 photocurrents (39), which suggests that this residue is needed for correct protein folding  
251 and/or membrane targeting.

252 Glu90 appears to be essential for cation conductance in *CrChR2*, as mutation of this residue to  
253 Lys or Arg confers permeability for anions (19). Yet, this Glu is conserved in most ACRs except  
254 those from prasinophytes and Labyrinthulea. In the unphotolyzed state of both *CrChR2* (40) and  
255 *GtACR1* (41) this residue is neutral at neutral pH. Glu90 deprotonates during the photocycle of  
256 *CrChR2* (42, 43). Photoinduced protonation changes of the Glu90 homolog in *GtACR1* (Glu68)  
257 have not been studied by time-resolved molecular spectroscopy, but electrophysiological and  
258 UV-vis flash-photolysis data indicate that it also deprotonates upon photoexcitation (44).  
259 Further research is needed to clarify the role of this residue in anion conductance.

260 Photocurrent desensitization in different ChR families correlates with accumulation of different  
261 intermediates of the photocycle. In *MerMAID1* desensitization is correlated with the M  
262 intermediate (22), but in *Rhodomonas* BCCRs it is with a novel extremely blue-shifted  
263 intermediate (23). Finally, desensitization in *CrChR2* is correlated with accumulation of blue-  
264 absorbing P480 that is considered either as a late intermediate in a single branched photocycle  
265 (45) or the initial state of a parallel photocycle (43). Desensitization was reduced in the E44Q  
266 and C84T mutants of *MerMAID1* (22). However, the mutated residues (corresponding,  
267 respectively, to Glu90 and Cys128 of *CrChR2*) are not the sole cause of strong desensitization in  
268 *MerMAIDs*, because they are conserved in many ChRs that do not show strong desensitization,  
269 including the closely related *sTACR1* characterized here.

270 According to quantum mechanical/molecular mechanical calculations using the *GtACR1* crystal  
271 structure, replacement of Ser156 with Gly or Ala stabilizes  $S_0$ , predicting a 11-12-nm blue shift  
272 of the absorption maximum (46). All tested cryptophyte ACRs that contain Gly in this position  
273 exhibited blue-shifted spectra. The spectra of two ACRs that contain Ala in this position  
274 (*R7ACR1* and *R8ACR3*) were ~25 nm blue-shifted from that of *GtACR1*, whereas the spectra of  
275 the other two (*C2ACR* and *R8ACR2*) were very similar to that of *GtACR1*, suggesting that the  
276 expected phenotypic effect of Ser to Ala substitution in these proteins was compensated for by  
277 other changed residues.

278 Our results and those of other groups suggest that most biophysical properties of ChRs relevant  
279 for their optogenetic applications cannot be assigned to a few individual residues, but rather  
280 reflect interactions between many of them. A cumulative larger set of electrophysiological data  
281 to which our study contributes might be used in the future to train machine learning algorithms  
282 to identify sequence motifs that define ionic selectivity, desensitization and absorption spectra.  
283 Implementation of such algorithms has already helped to improve plasma membrane targeting  
284 and light sensitivity of ChRs (47, 48).



285 Protein sequences of dinoflagellate ChRs and their metagenomic homologs are distantly related  
286 to ChRs from giant viruses (Fig. 1), two of which have been shown recently to passively conduct  
287 cations upon heterologous expression (7). However, Asp212 of bacteriorhodopsin is conserved  
288 in these viral CCRs, as in most other known microbial rhodopsins, whereas it is replaced with  
289 Asn in dinoflagellate ChRs. Analysis of *Symbiodinium* transcriptomes reveals potential latent  
290 infection by large dsDNA viruses (49), so viral origin of dinoflagellate ChRs cannot be excluded.

291 So far, the function of ChRs as photoreceptors guiding phototaxis has been verified directly only  
292 in the chlorophyte *C. reinhardtii*, the model organism for which methods of gene silencing and  
293 knockdown have been developed (1, 50). Several other chlorophyte and one cryptophyte  
294 species have been shown to generate photoreceptor currents, very similar to those in *C.*  
295 *reinhardtii* and likely resulting from ChR photoexcitation (51-54). The direction of  
296 photoreceptor currents recorded in both freshwater and marine flagellates is depolarizing,  
297 which reflects cation influx or anion efflux. Both *C. reinhardtii* phototaxis receptors are CCRs (2,  
298 3), but ACRs might also contribute to depolarizing photoreceptor currents even in marine  
299 flagellates, if their membrane potential is sufficiently low. To the best of our knowledge, the  
300 membrane potential has not been estimated in any ACR-containing organism, but it is -170 mV  
301 in the giant marine unicellular alga *Acetabularia mediterranea* (55).

302 Based on the action spectra of dinoflagellate phototaxis, rhodopsins have been suggested as  
303 photoreceptors that guide this behavior (56). Our demonstration of channel activity in  
304 dinoflagellate rhodopsins with the TCP motif in TM3 strongly supports this hypothesis. The  
305 spectral sensitivity of dinoflagellate ChRs matches that of phototactic accumulation observed in  
306 *Symbiodinium* and unclassified coral symbiotic dinoflagellates (57, 58). The latter studies  
307 suggest that coral larvae use GFP fluorescence to attract dinoflagellate symbionts that are  
308 necessary for their survival.

309 Manual patch clamp is time-consuming and requires considerable skill. We sought to test  
310 whether APC can be used for characterization of hundreds of ChR variants that evolved in  
311 various protists. The planar-array principle implemented in the SyncroPatch 384i allows seal  
312 formation on micron-size orifices in the glass bottom of microwell plates (chips) into which cell  
313 suspension is pipetted, thus bypassing pipette fabrication and offering the option for recording  
314 multiple cells in parallel (59). APC is mostly used for drug screening, especially cardiac safety  
315 testing, in stably transfected cell lines. However, generation of such lines for ChR screening is  
316 not practical. We found that even upon chemical transfection that yielded only 30-70% visibly  
317 fluorescent cells depending on the construct, using the SyncroPatch 384i considerably sped up  
318 data collection, as compared to manual patch clamp.

## 319 MATERIALS AND METHODS

### 320 *Bioinformatics*

321 To identify metagenomic homologs of MerMAIDs, haptophyte ACRs and Labyrinthulea ACRs,  
322 we first searched selected datasets of the Integrated Microbial Genomes and Microbiomes at  
323 the Department of Energy's Joint Genome Institute (JGI) (Data Set S4) using the keyword  
324 "rhodopsin", and then performed blastp (protein-protein BLAST) search using RubyACR  
325 sequences as a query. A similar procedure was used to identify rhodopsin genes in the  
326 dinoflagellate genomes from various sources listed in Data Set S4. *Cafeteria roenbergensis* ChRs  
327 were identified in the National Center for Biotechnology Information (NCBI) non-redundant  
328 protein database using blastp and *Gt*ACR1 sequence as a query.

329 To explore the diversity of cryptophyte ACRs, we analyzed transcriptomes of 20 cryptophyte  
330 strains each sequenced on the Illumina HiSeq 2000 platform and assembled with the Bridger  
331 algorithm (60). Using a hidden Markov model (HMM) (61) based on known cryptophyte ACRs,  
332 we identified 15 novel transcripts for experimental characterization. We also analyzed 136  
333 deep-ocean metatranscriptomic libraries from the TARA Oceans Expedition (62) assembled with  
334 the Plass protein-level algorithm (63). Four distinct HMMs were built using previously known  
335 sequences of cryptophyte ACRs, cryptophyte BCCRs, chlorophyte CCRs and MerMAIDs. While  
336 many transcripts could be uniquely assigned to one of these four HMMs, some aligned weakly  
337 but equally well to two or more HMMs, and could not be assigned unambiguously. Remarkably,  
338 17 of these "ambiguous" sequences turned out to be close homologs of dinoflagellate ChRs that  
339 were not included among our HMMs.

340 Rhodopsin sequences from Data Set S1 were aligned using MUSCLE with default parameters as  
341 implemented in MegAlign Pro software v. 17.1.1 (DNASTAR Lasergene, Madison, WI) and  
342 truncated after the end of TM7. Phylogeny was analyzed with IQ-TREE v. 2.1.2 (64) using  
343 automatic model selection and ultrafast bootstrap approximation (1000 replicates) (65). The  
344 best tree was visualized and annotated with iTOL v. 5.7 (66).

#### 345 *Molecular biology and HEK293 transfection*

346 DNA polynucleotides encoding the opsin domains optimized for human codon usage were  
347 synthesized and cloned by GenScript (Piscataway, NJ) into the mammalian expression vector  
348 pcDNA3.1 (Life Technologies, Grand Island, NY) in frame with an EYFP tag for expression in  
349 HEK293 cells. The cells were transfected using the ScreenFectA transfection reagent (Waco  
350 Chemicals USA, Richmond, VA). All-*trans*-retinal (Sigma) was added at the final concentration of  
351 3  $\mu$ M immediately after transfection.

#### 352 *Manual patch clamp recording*

353 Photocurrents were recorded 48-96 h after transfection in whole-cell voltage clamp mode with  
354 an AxoPatch 200B amplifier and digitized with a Digidata 1440A using pClamp 10 software (all  
355 from Molecular Devices, Union City, CA). Patch pipettes with resistances of 2-4 M $\Omega$  were  
356 fabricated from borosilicate glass. The ionic compositions of the bath and pipette solutions are  
357 shown in Table S1. For determination of  $E_{rev}$ , K<sup>+</sup> in the pipette solution was replaced with Na<sup>+</sup> to  
358 minimize the number of ionic species in the system, and the holding voltages were corrected

359 for liquid junction potentials calculated using the Clampex built-in calculator. Continuous light  
360 pulses were provided by a Polychrome V (T.I.L.L. Photonics GMBH, Grafelfing, Germany) in  
361 combination with a mechanical shutter (Uniblitz Model LS6, Vincent Associates, Rochester, NY;  
362 half-opening time 0.5 ms). The maximal photon density at the focal plane of the 40× objective  
363 was 5.2-8.5 mW mm<sup>-2</sup> depending on the wavelength. The action spectra were constructed by  
364 calculation of the initial slope of photocurrent and corrected for the photon density measured  
365 at each wavelength (5). Further analysis was performed using Origin Pro software (OriginLab  
366 Corporation, Northampton, MA). The images were taken with a CoolSNAP HQ2 monochrome  
367 camera (Photometrics, Tucson, AZ).

### 368 *Automated patch clamp recording*

369 Automated patch clamp recording was conducted with a SyncroPatch 384i (Nanion  
370 Technologies) using planar borosilicate glass medium-resistance chips in a 384 microtiter plate  
371 format with one or four holes per well and Nanion Standard solutions (for their composition  
372 see Table S1). Transfected cells were dissociated using TrypLE™ Express, diluted with CHO-S-  
373 SFM-II medium (both from ThermoFisher) and resuspended in External Physiological solution  
374 (Nanion Technologies) at 10<sup>5</sup>-4×10<sup>5</sup> cells ml<sup>-1</sup>. Each well was filled with 30 µl Chip Fill solution,  
375 to which 20 µl of the cell suspension was added. Seal formation was enhanced by the addition  
376 of 40 µl of NMDG 60 solution with 10 mM CaCl<sub>2</sub> (final concentration). After capturing the cells,  
377 50 µl of the external solution was replaced with 40 µl of NMDG 60 solution, and 40 µl of the  
378 mixture was removed. For data acquisition and analysis, respectively, PatchControl384 and  
379 DataControl384 software v. 1.9.0 was used (both Nanion Technologies). Illumination was  
380 provided with LUXEON Z blue LEDs LXZ1-PB01 (470 ± 20 nm) controlled by custom-built  
381 software.

### 382 *Statistics*

383 Descriptive statistics was used as implemented in Origin software. The data are presented as  
384 mean ± sem values; the data from individual replicates are also shown when appropriate. The  
385 sample size was estimated from previous experience and published work on similar subjects, as  
386 recommended by the NIH guidelines. No normal distribution of the data was assumed; when a  
387 specific statistics hypothesis was tested, non-parametric tests were used.

### 388 *Data availability*

389 The polynucleotide sequences of ChR homologs reported in this study have been deposited to  
390 GenBank (accession numbers MW557552-MW557594).

### 391 *Acknowledgements*

392 We thank Dr. Tim Strassmaier, Leo Angelo Morada, Stephan Holzhauser and Rasmus Gönner  
393 (Nanion Technologies) for their expert help with the SyncroPatch 384i.

### 394 *Funding*

395 This work was supported by National Institutes of Health Grants R01GM027750 and  
396 U01NS118288, and Endowed Chair AU-0009 from the Robert A. Welch Foundation to J.L.S, and  
397 by the Natural Sciences and Engineering Research Council of Canada (NSERC) Discovery Grant  
398 RGPIN-2018-04397 to L.S.B. A.P. was supported by a NSERC USRA scholarship, S.C. was  
399 supported by the Agricultural Science and Technology Innovation Program (ASTIP). The access  
400 to the SyncroPatch 384i was provided by a research grant from Nanion Technologies. The work  
401 conducted by the U.S. Department of Energy Joint Genome Institute, a DOE Office of Science  
402 User Facility, is supported by the Office of Science of the U.S. Department of Energy under  
403 Contract No. DE-AC02-05CH11231. The content is solely the responsibility of the authors and  
404 does not necessarily represent the official views of the National Institutes of Health.

#### 405 **Conflict of interest**

406 The authors declare no conflict of interest.

#### 407 REFERENCES

- 408 1. Sineshchekov OA, Jung K-H, Spudich JL. 2002. Two rhodopsins mediate phototaxis to  
409 low- and high-intensity light in *Chlamydomonas reinhardtii*. Proc Natl Acad Sci USA  
410 99:8689-8694.
- 411 2. Nagel G, Ollig D, Fuhrmann M, Kateriya S, Musti AM, Bamberg E, Hegemann P. 2002.  
412 Channelrhodopsin-1: a light-gated proton channel in green algae. Science 296:2395-8.
- 413 3. Nagel G, Szellas T, Huhn W, Kateriya S, Adeishvili N, Berthold P, Ollig D, Hegemann P,  
414 Bamberg E. 2003. Channelrhodopsin-2, a directly light-gated cation-selective membrane  
415 channel. Proc Natl Acad Sci USA 100:13940-5.
- 416 4. Govorunova EG, Sineshchekov OA, Liu X, Janz R, Spudich JL. 2015. Natural light-gated  
417 anion channels: A family of microbial rhodopsins for advanced optogenetics. Science  
418 349:647-650.
- 419 5. Govorunova EG, Sineshchekov OA, Li H, Wang Y, Brown LS, Spudich JL. 2020. RubyACRs,  
420 non-algal anion channelrhodopsins with highly red-shifted absorption. Proc Natl Acad  
421 Sci USA 117:22833-22840.
- 422 6. Rozenberg A, Oppermann J, Wietek J, Fernandez Lahore RG, Sandaa RA, Bratbak G,  
423 Hegemann P, Béjà O. 2020. Lateral gene transfer of anion-conducting  
424 channelrhodopsins between green algae and giant viruses. Curr Biol 30:4910-4920.
- 425 7. Zabelskii D, Alekseev A, Kovalev K, Rankovic V, Balandin T, Soloviov D, Bratanov D,  
426 Savelyeva E, Podolyak E, Volkov D, Vaganova S, Astashkin R, Chizhov I, Yutin N, Rulev M,  
427 Popov A, Eria-Oliveira AS, Rokitskaya T, Mager T, Antonenko Y, Rosselli R, Armeev G,  
428 Shaitan K, Vivaudou M, Buldt G, Rogachev A, Rodriguez-Valera F, Kirpichnikov M, Moser  
429 T, Offenhausser A, Willbold D, Koonin E, Bamberg E, Gordeliy V. 2020. Viral rhodopsins 1  
430 are an unique family of light-gated cation channels. Nat Commun 11:5707.
- 431 8. Govorunova EG, Sineshchekov OA, Li H, Spudich JL. 2017. Microbial rhodopsins:  
432 Diversity, mechanisms, and optogenetic applications. Annu Rev Biochem 86:845-872.
- 433 9. Deisseroth K. 2015. Optogenetics: 10 years of microbial opsins in neuroscience. Nat  
434 Neurosci 18:1213-1225.

- 435 10. Sasse P, Funken M, Beiert T, Bruegmann T. 2019. Optogenetic termination of cardiac  
436 arrhythmia: Mechanistic enlightenment and therapeutic application? *Front Physiol*  
437 10:675.
- 438 11. Kato HE, Zhang F, Yizhar O, Ramakrishnan C, Nishizawa T, Hirata K, Ito J, Aita Y, Tsukazaki  
439 T, Hayashi S, Hegemann P, Maturana AD, Ishitani R, Deisseroth K, Nureki O. 2012. Crystal  
440 structure of the channelrhodopsin light-gated cation channel. *Nature* 482:369-374.
- 441 12. Volkov O, Kovalev K, Polovinkin V, Borshchevskiy V, Bamann C, Astashkin R, Marin E,  
442 Popov A, Balandin T, Willbold D, Buldt G, Bamberg E, Gordeliy V. 2017. Structural  
443 insights into ion conduction by channelrhodopsin 2. *Science* 358:eaan8862.
- 444 13. Oda K, Vierock J, Oishi S, Rodriguez-Rozada S, Taniguchi R, Yamashita K, Wiegert JS,  
445 Nishizawa T, Hegemann P, Nureki O. 2018. Crystal structure of the red light-activated  
446 channelrhodopsin Chrimson. *Nat Commun* 9:3949.
- 447 14. Kim YS, Kato HE, Yamashita K, Ito S, Inoue K, Ramakrishnan C, Fenno LE, Evans KE, Paggi  
448 JM, Dror RO, Kandori H, Kobilka BK, Deisseroth K. 2018. Crystal structure of the natural  
449 anion-conducting channelrhodopsin *GtACR1*. *Nature* 561:343-348.
- 450 15. Li H, Huang CY, Govorunova EG, Schafer CT, Sineshchekov OA, Wang M, Zheng L,  
451 Spudich JL. 2019. Crystal structure of a natural light-gated anion channelrhodopsin. *Elife*  
452 8:e41741.
- 453 16. Zhang F, Vierock J, Yizhar O, Fenno LE, Tsunoda S, Kianianmomeni A, Prigge M, Berndt A,  
454 Cushman J, Polle J, Magnuson J, Hegemann P, Deisseroth K. 2011. The microbial opsin  
455 family of optogenetic tools. *Cell* 147:1446-57.
- 456 17. Berndt A, Lee SY, Ramakrishnan C, Deisseroth K. 2014. Structure-guided transformation  
457 of channelrhodopsin into a light-activated chloride channel. *Science* 344:420-424.
- 458 18. Wietek J, Beltramo R, Scanziani M, Hegemann P, Oertner TG, Wiegert JS. 2015. An  
459 improved chloride-conducting channelrhodopsin for light-induced inhibition of neuronal  
460 activity in vivo. *Sci Rep* 5:14807.
- 461 19. Wietek J, Wiegert JS, Adeishvili N, Schneider F, Watanabe H, Tsunoda SP, Vogt A, Elstner  
462 M, Oertner TG, Hegemann P. 2014. Conversion of channelrhodopsin into a light-gated  
463 chloride channel. *Science* 344:409-412.
- 464 20. Berndt A, Lee SY, Wietek J, Ramakrishnan C, Steinberg EE, Rashid AJ, Kim H, Park S,  
465 Santoro A, Frankland PW, Iyer SM, Pak S, Ahrlund-Richter S, Delp SL, Malenka RC,  
466 Josselyn SA, Carlen M, Hegemann P, Deisseroth K. 2016. Structural foundations of  
467 optogenetics: Determinants of channelrhodopsin ion selectivity. *Proc Natl Acad Sci USA*  
468 113:822-829.
- 469 21. Wietek J, Rodriguez-Rozada S, Tutas J, Tenedini F, Grimm C, Oertner TG, Soba P,  
470 Hegemann P, Wiegert JS. 2017. Anion-conducting channelrhodopsins with tuned spectra  
471 and modified kinetics engineered for optogenetic manipulation of behavior. *Sci Rep*  
472 7:14957.
- 473 22. Oppermann J, Fischer P, Silapetere A, Liepe B, Rodriguez-Rozada S, Flores-Urbe J, Peter  
474 E, Keidel A, Vierock J, Kaufmann J, Broser M, Luck M, Bartl F, Hildebrandt P, Simon  
475 Wiegert J, Beja O, Hegemann P, Wietek J. 2019. MerMAIDs: a family of metagenomically  
476 discovered marine anion-conducting and intensely desensitizing channelrhodopsins. *Nat*  
477 *Commun* 10:3315.

- 478 23. Sineshchekov OA, Govorunova EG, Li H, Wang Y, Melkonian M, Wong GK-S, Brown LS,  
479 Spudich JL. 2020. Conductance mechanisms of rapidly desensitizing cation  
480 channelrhodopsins from cryptophyte algae. *mBio* 11:e00657-20.
- 481 24. Sineshchekov OA, Govorunova EG, Wang J, Li H, Spudich JL. 2013. Intramolecular proton  
482 transfer in channelrhodopsins. *Biophys J* 104:807-817.
- 483 25. Labarre A, Lopez-Escardo D, Latorre F, Leonard G, Bucchini F, Obiol A, Cruaud C, Sieracki  
484 ME, Jaillon O, Wincker P, Vandepoele K, Logares R, Massana R. 2021. Comparative  
485 genomics reveals new functional insights in uncultured MAST species. *ISME J*  
486 doi:10.1038/s41396-020-00885-8.
- 487 26. Kojima K, Miyoshi N, Shibukawa A, Chowdhury S, Tsujimura M, Noji T, Ishikita H,  
488 Yamanaka A, Sudo Y. 2020. Green-sensitive, long-lived, step-functional anion  
489 channelrhodopsin-2 variant as a high-potential neural silencing tool. *J Phys Chem Lett*  
490 11:6214-6218.
- 491 27. Forward RB. 1974. Phototaxis by the dinoflagellate *Gymnodinium splendens* Lebour. *J*  
492 *Protozool* 21:312-315.
- 493 28. Liu S-M, Häder D-P, Ullrich W. 1990. Photoorientation in the freshwater dinoflagellate,  
494 *Peridinium gatunense* Nygaard. *FEMS Microbiol Lett* 73:91-102.
- 495 29. Horiguchi T, Kawai H, Kubota M, Takahashi T, Watanabe M. 1999. Phototactic responses  
496 of four marine dinoflagellates with different types of eyespot and chloroplast. *Phycol*  
497 *Res* 47:101-107.
- 498 30. Slamovits CH, Okamoto N, Burri L, James ER, Keeling PJ. 2011. A bacterial  
499 proteorhodopsin proton pump in marine eukaryotes. *Nat Commun* 2:183.
- 500 31. Marchetti A, Schrueth DM, Durkin CA, Parker MS, Kodner RB, Berthiaume CT, Morales R,  
501 Allen AE, Armbrust EV. 2012. Comparative metatranscriptomics identifies molecular  
502 bases for the physiological responses of phytoplankton to varying iron availability. *Proc*  
503 *Natl Acad Sci USA* 109:E317-25.
- 504 32. Coesel SN, Durham BP, Groussman RD, Hu SK, Caron DA, Morales RL, Ribalet F, Armbrust  
505 EV. 2021. Diel transcriptional oscillations of light-sensitive regulatory elements in open-  
506 ocean eukaryotic plankton communities. *Proc Natl Acad Sci USA* 118.
- 507 33. Shoguchi E, Shinzato C, Kawashima T, Gyoja F, Mungpakdee S, Koyanagi R, Takeuchi T,  
508 Hisata K, Tanaka M, Fujiwara M, Hamada M, Seidi A, Fujie M, Usami T, Goto H, Yamasaki  
509 S, Arakaki N, Suzuki Y, Sugano S, Toyoda A, Kuroki Y, Fujiyama A, Medina M, Coffroth  
510 MA, Bhattacharya D, Satoh N. 2013. Draft assembly of the *Symbiodinium minutum*  
511 nuclear genome reveals dinoflagellate gene structure. *Curr Biol* 23:1399-408.
- 512 34. Aranda M, Li Y, Liew YJ, Baumgarten S, Simakov O, Wilson MC, Piel J, Ashoor H,  
513 Bougouffa S, Bajic VB, Ryu T, Ravasi T, Bayer T, Micklem G, Kim H, Bhak J, LaJeunesse TC,  
514 Voolstra CR. 2016. Genomes of coral dinoflagellate symbionts highlight evolutionary  
515 adaptations conducive to a symbiotic lifestyle. *Sci Rep* 6:39734.
- 516 35. Shoguchi E, Beedessee G, Tada I, Hisata K, Kawashima T, Takeuchi T, Arakaki N, Fujie M,  
517 Koyanagi R, Roy MC, Kawachi M, Hidaka M, Satoh N, Shinzato C. 2018. Two divergent  
518 *Symbiodinium* genomes reveal conservation of a gene cluster for sunscreen biosynthesis  
519 and recently lost genes. *BMC Genomics* 19:458.

- 520 36. Grigoriev IV, Hayes RD, Calhoun S, Kamel B, Wang A, Ahrendt S, Dusheyko S, Nikitin R,  
521 Mondo SJ, Salamov A, Shabalov I, Kuo A. 2021. PhycoCosm, a comparative algal  
522 genomics resource. *Nucleic Acids Res* 49:D1004-D1011.
- 523 37. Gradinaru V, Zhang F, Ramakrishnan C, Mattis J, Prakash R, Diester I, Goshen I,  
524 Thompson KR, Deisseroth K. 2010. Molecular and cellular approaches for diversifying  
525 and extending optogenetics. *Cell* 141:154-65.
- 526 38. Olsson MHM, Sondergaard CR, Rostkowski M, Jensen JH. 2011. PROPKA3: Consistent  
527 treatment of internal and surface residues in empirical pK(a) predictions. *J Chem Theory*  
528 *Comput* 7:525–537.
- 529 39. Sugiyama Y, Wang H, Hikima T, Sato M, Kuroda J, Takahashi T, Ishizuka T, Yawo H. 2009.  
530 Photocurrent attenuation by a single polar-to-nonpolar point mutation of  
531 channelrhodopsin-2. *Photochem Photobiol Sci* 8:328-36.
- 532 40. Ritter E, Stehfest K, Berndt A, Hegemann P, Bartl FJ. 2008. Monitoring light-induced  
533 structural changes of Channelrhodopsin-2 by UV-visible and Fourier transform infrared  
534 spectroscopy. *J Biol Chem* 283:35033-35041.
- 535 41. Yi A, Mamaeva NV, Li H, Spudich JL, Rothschild KJ. 2016. Resonance Raman study of an  
536 anion channelrhodopsin: Effects of mutations near the retinylidene Schiff base.  
537 *Biochemistry* 55:2371-2380.
- 538 42. Lorenz-Fonfria VA, Resler T, Krause N, Nack M, Gossing M, Fischer von Mollard G,  
539 Bamann C, Bamberg E, Schlesinger R, Heberle J. 2013. Transient protonation changes in  
540 channelrhodopsin-2 and their relevance to channel gating. *Proc Natl Acad Sci USA*  
541 110:E1273-81.
- 542 43. Kuhne J, Vierock J, Tennigkeit SA, Dreier MA, Wietek J, Petersen D, Gavriljuk K, El-  
543 Mashtoly SF, Hegemann P, Gerwert K. 2019. Unifying photocycle model for light  
544 adaptation and temporal evolution of cation conductance in channelrhodopsin-2. *Proc*  
545 *Natl Acad Sci USA* 116:9380-9389.
- 546 44. Sineshchekov OA, Li H, Govorunova EG, Spudich JL. 2016. Photochemical reaction cycle  
547 transitions during anion channelrhodopsin gating. *Proc Natl Acad Sci USA* 113:E1993-  
548 2000.
- 549 45. Lorenz-Fonfria VA, Heberle J. 2014. Channelrhodopsin unchained: structure and  
550 mechanism of a light-gated cation channel. *Biochim Biophys Acta* 1837:626-42.
- 551 46. Tsujimura M, Noji T, Saito K, Kojima K, Sudo Y, Ishikita H. 2020. Mechanism of  
552 absorption wavelength shifts in anion channelrhodopsin-1 mutants. *Biochim Biophys*  
553 *Acta Bioenerg* 1862:148349.
- 554 47. Bedbrook CN, Yang KK, Rice AJ, Gradinaru V, Arnold FH. 2017. Machine learning to  
555 design integral membrane channelrhodopsins for efficient eukaryotic expression and  
556 plasma membrane localization. *PLoS Comput Biol* 13:e1005786.
- 557 48. Bedbrook CN, Yang KK, Robinson JE, Mackey ED, Gradinaru V, Arnold FH. 2019. Machine  
558 learning-guided channelrhodopsin engineering enables minimally invasive optogenetics.  
559 *Nat Methods* 16:1176-1184.
- 560 49. Lawrence SA, Fløge SA, Davy JE, Davy SK, Wilson WH. 2017. Exploratory analysis of  
561 *Symbiodinium* transcriptomes reveals potential latent infection by large dsDNA viruses.  
562 *Environ Microbiol* 19:3909-3919.

- 563 50. Greiner A, Kelterborn S, Evers H, Kreimer G, Sizova I, Hegemann P. 2017. Targeting of  
564 photoreceptor genes in *Chlamydomonas reinhardtii* via zinc-finger nucleases and  
565 CRISPR/Cas9. *Plant Cell* 29:2498-2518.
- 566 51. Litvin FF, Sineshchekov OA, Sineshchekov VA. 1978. Photoreceptor electric potential in  
567 the phototaxis of the alga *Haematococcus pluvialis*. *Nature* 271:476-478.
- 568 52. Sineshchekov OA, Govorunova EG, Jung K-H, Zauner S, Maier U-G, Spudich JL. 2005.  
569 Rhodopsin-mediated photoreception in cryptophyte flagellates. *Biophys J* 89:4310-4319.
- 570 53. Govorunova EG, Spudich EN, Lane CE, Sineshchekov OA, Spudich JL. 2011. New  
571 channelrhodopsin with a red-shifted spectrum and rapid kinetics from *Mesostigma*  
572 *viride*. *mBio* 2:e00115-11.
- 573 54. Govorunova EG, Sineshchekov OA, Li H, Janz R, Spudich JL. 2013. Characterization of a  
574 highly efficient blue-shifted channelrhodopsin from the marine alga *Platymonas*  
575 *subcordiformis*. *J Biol Chem* 288:29911-29922.
- 576 55. Saddler HDW. 1970. The membrane potential of *Acetabularia mediterranea*. *J Gen*  
577 *Physiol* 55:802-821.
- 578 56. Foster K-W, Smyth RD. 1980. Light antennas in phototactic algae. *Microbiol Rev* 44:572-  
579 630.
- 580 57. Hollingsworth LL, Kinzie RA, Lewis TD, Krupp DA, Leong JAC. 2015. Phototaxis of motile  
581 zooxanthellae to green light may facilitate symbiont capture by coral larvae. *Coral Reefs*  
582 24:523.
- 583 58. Aihara Y, Maruyama S, Baird AH, Iguchi A, Takahashi S, Minagawa J. 2019. Green  
584 fluorescence from cnidarian hosts attracts symbiotic algae. *Proc Natl Acad Sci USA*  
585 116:2118-2123.
- 586 59. Obergrussberger A, Friis S, Bruggemann A, Fertig N. 2021. Automated patch clamp in  
587 drug discovery: major breakthroughs and innovation in the last decade. *Expert Opin*  
588 *Drug Discov* 16:1-5.
- 589 60. Chang Z, Li G, Liu J, Zhang Y, Ashby C, Liu D, Cramer CL, Huang X. 2015. Bridger: A new  
590 framework for de novo transcriptome assembly using RNA-seq data. *Genome Biol* 16:30.
- 591 61. Eddy SR. 2011. Accelerated profile HMM searches. *PLoS Comput Biol* 7:e1002195.
- 592 62. Carradec Q, Pelletier E, Da Silva C, Alberti A, Seeleuthner Y, Blanc-Mathieu R, Lima-  
593 Mendez G, Rocha F, Tirichine L, Labadie K, Kirilovsky A, Bertrand A, Engelen S, Madoui  
594 MA, Meheust R, Poulain J, Romac S, Richter DJ, Yoshikawa G, Dimier C, Kandels-Lewis S,  
595 Picheral M, Searson S, Tara Oceans C, Jaillon O, Aury JM, Karsenti E, Sullivan MB,  
596 Sunagawa S, Bork P, Not F, Hingamp P, Raes J, Guidi L, Ogata H, de Vargas C, Iudicone D,  
597 Bowler C, Wincker P. 2018. A global ocean atlas of eukaryotic genes. *Nat Commun*  
598 9:373.
- 599 63. Steinegger M, Mirdita M, Söding J. 2019. Protein-level assembly increases protein  
600 sequence recovery from metagenomic samples manyfold. *Nat Methods* 16:603-606.
- 601 64. Minh BQ, Schmidt HA, Chernomor O, Schrempf D, Woodhams MD, von Haeseler A,  
602 Lanfear R. 2020. IQ-TREE 2: New models and efficient methods for phylogenetic  
603 inference in the genomic era. *Mol Biol Evol* 37:1530-1534.
- 604 65. Hoang DT, Chernomor O, von Haeseler A, Minh BQ, Vinh LS. 2018. UFBoot2: Improving  
605 the ultrafast bootstrap approximation. *Mol Biol Evol* 35:518-522.



- 606 66. Letunic I, Bork P. 2019. Interactive Tree Of Life (iTOL) v4: recent updates and new  
607 developments. *Nucleic Acids Res* 47:W256-W259.
- 608 67. Sineshchekov OA, Govorunova EG, Li H, Spudich JL. 2017. Bacteriorhodopsin-like  
609 channelrhodopsins: Alternative mechanism for control of cation conductance. *Proc Natl*  
610 *Acad Sci USA* 114:E9512-E9519.
- 611 68. Klapoetke NC, Murata Y, Kim SS, Pulver SR, Birdsey-Benson A, Cho YK, Morimoto TK,  
612 Chuong AS, Carpenter EJ, Tian Z, Wang J, Xie Y, Yan Z, Zhang Y, Chow BY, Surek B,  
613 Melkonian M, Jayaraman V, Constantine-Paton M, Wong GK, Boyden ES. 2014.  
614 Independent optical excitation of distinct neural populations. *Nat Methods* 11:338-346.
- 615 69. Tashiro R, Sushmita K, Hososhima S, Sharma S, Kateriya S, Kandori H, Tsunoda SP. 2021.  
616 Specific residues in the cytoplasmic domain modulate photocurrent kinetics of  
617 channelrhodopsin from the alga *Klebsormidium nitens*. *Commun Biol* 4:235.

## 618 FIGURE LEGENDS

619 **Figure 1.** An unrooted phylogenetic tree of ChRs. The nodes are color-coded as following: red,  
620 confirmed anion selectivity; blue, confirmed cation selectivity; gray, non-functional; black, ion  
621 selectivity not determined. Thicker nodes show ChRs characterized in this study. Gray circles  
622 show ultrafast bootstrap support values above 95%. A tree file in the Newick format is available  
623 as Data Set S2, and the corresponding protein alignment, as Data Set S3.

624 **Figure 2.** Prasinophyte CCRs. (A) Amino acid residues corresponding to the indicated positions  
625 in CrChR2. ChRs characterized in this study are in bold (black, functional; gray, non-functional).  
626 Conserved glutamates are highlighted red. (B) Peak photocurrent amplitudes generated at -60  
627 mV in response to 1-s light pulses at the wavelength of the spectral maximum. (C)  
628 Desensitization of photocurrents after 1-s illumination. (D) Action spectra of photocurrents. The  
629 data points show mean  $\pm$  sem ( $n = 4-8$  scans). (E) Reversal potentials of photocurrents. The bars  
630 in B, C and E show mean  $\pm$  sem; diamonds, data from individual cells.

631 **Figure 3.** Stramenopile ACRs and their metagenomic homologs. (A) Amino acid residues in the  
632 ion conductance pathway, corresponding to the indicated positions in CrChR2. ChRs  
633 characterized in this study are in bold face. Conserved glutamates are highlighted red. (B) Peak  
634 photocurrent amplitudes generated at -60 mV in response to 1-s light pulses at the wavelength  
635 of the spectral maximum. (C) Desensitization of photocurrents after 1-s illumination. (D)  
636 Reversal potentials of photocurrents. In B-D the bars show mean  $\pm$  sem; empty diamonds, data  
637 from individual cells. (E and F) Action spectra of photocurrents. The data points are mean  $\pm$  sem  
638 ( $n = 4-6$  scans).

639 **Figure 4.** Cryptophyte ACRs. (A) Amino acid residues corresponding to the indicated positions in  
640 CrChR2. ChRs characterized in this study are in bold, non-functional homologs are in grey.  
641 Conserved glutamates are highlighted red. (B) Peak photocurrent amplitudes generated at -60  
642 mV in response to 1-s light pulses at the wavelength of the spectral maximum. (C)  
643 Desensitization of photocurrents after 1-s illumination. (D and E) Series of photocurrent traces

644 recorded from R3ACR1 upon incremental voltage increase with the SyncroPatch 384i (D) and  
645 AxoPatch 200B (E) at 470-nm excitation. Note the smaller amplitude and slower kinetics of the  
646 SyncroPatch traces, as expected from the lower stimulus intensity. (F) Reversal potentials of  
647 photocurrents. In B, C and F the bars show mean  $\pm$  sem; empty diamonds, data from individual  
648 cells.

649 **Figure 5.** Color tuning in cryptophyte ACRs. (A) A crystal structure of *GtACR1* (6EDQ) showing  
650 the three side chains that contribute to the spectral difference between *GtACR1* and *GtACR2*. (B  
651 and D) Action spectra of photocurrents generated by the indicated cryptophyte ACRs. The data  
652 points show mean  $\pm$  sem (n = 4-8 scans). (C) Amino acid residues involved in color tuning in the  
653 functional cryptophyte homologs. The numbering is according to the *GtACR1* sequence.

654 **Figure 6.**  $\Delta SmChR1$  and its metagenomic homolog *mgdChR1*. (A) Peak photocurrent amplitudes  
655 generated at -60 mV in response to 1-s light pulses at the wavelength of the spectral maximum.  
656 The bars show mean  $\pm$  sem; empty diamonds, data from individual cells. The asterisk indicates  $p$   
657  $< 0.01$  by the Mann-Whitney test. “*mgdChR1no*” denotes the construct without TS and ER  
658 motifs. (B) Photocurrent traces recorded at -60 and 60 mV from *mgdChR1* (top) and  $\Delta SmChR1$   
659 (bottom). The  $\Delta SmChR1$  at 60 mV was shifted 50 ms to the right relative to the trace at -60 mV  
660 to show the fast negative peak. (C) Action spectra of photocurrents. The data points show mean  
661  $\pm$  sem (n = 10-12 scans).

## 662 SUPPLEMENTAL TEXT

### 663 Supplemental Results

#### 664 “Core” chlorophyte and streptophyte ChR homologs

665 Only one Glu residue (corresponding to Glu82 of *CrChR2*) is conserved in TM2 of the  
666 functionally characterized *Pyramimonas* ACRs (6). Four sequences from Chlorophyceae (two  
667 from *Chlamydomonas noctigama*, one from *Chlamydomonas* sp. and one from *Chloromonas*  
668 *subdivisa*) also exhibit this residue pattern (Fig. S1B). Upon expression of three of these  
669 polynucleotides, small hyperpolarizing photocurrents that did not reverse at positive voltages  
670 were recorded (Fig. S1C). They likely reflect intramolecular transfer of the Schiff base proton to  
671 an outwardly located acceptor, as previously found in other ChRs (24, 67). The *C. subdivisa*  
672 sequence was very poorly expressed and generated no currents.

673 Out of the four Chlorodendrophyceae sequences with the misplaced Asp212 homolog, one  
674 (named here *TchChR*) has already been tested earlier and found to be non-electrogenic (68).  
675 We have synthesized and tested two other sequences of this group, *PsChR4* from *P.*  
676 *subcordiformis* and *TaChR* from *T. astigmatica*. Neither generated photocurrents upon  
677 expression in HEK293 cells, although normal tag fluorescence was observed.

678 Functional CCRs have previously been reported in the streptophyte classes  
679 Mesostigmatophyceae (53) and Klebsormidiophyceae (69). A ChR homolog has also been

680 identified in *Coleochaete irregularis* (6) from the class Coleochaetophyceae, which is more  
681 closely related to land plants. However, we could not detect any photocurrents upon its  
682 expression in HEK293 cells.

### 683 **Supplemental Figure Legends**

684 **Figure S1.** (A) The residues of the retinal-binding pockets. Variants tested in this study are in  
685 bold. The residues in *MsCCR* and *CsCCR* that differ from those in Chrimson and RubyACRs,  
686 earlier known red-shifted ChRs, are highlighted red. The numbers are according to  
687 bacteriorhodopsin sequence. (B and D) The residues in the positions of the conserved  
688 glutamates (highlighted red) in the ion conductance pathway in the indicated homologs from  
689 Chlorophyceae (B) and Chlorodendrophyceae (D). Variants tested in this study are in bold, non-  
690 functional, in gray. The numbers are according to *CrChR2* sequence. (C) Photocurrent traces  
691 recorded from *C1ChR* in response to 1-s illumination at -60 and 60 mV. (E) Alignment of the part  
692 of TM7 of the indicated Chlorodendrophyceae homologs. The Schiff base Lys is highlighted  
693 blue; the upstream Glu, red.

694 **Figure S2.** A section of the phylogenetic tree from Fig. 1 redrawn in a rectangular format. Red  
695 nodes show variants with proven anion selectivity, thicker nodes show variants tested in this  
696 study. Red numbers are the values of photocurrent desensitization from Fig. 3C in the main text  
697 (mean  $\pm$  sem, n = 5-6 cells).

698 **Figure S3.** (A and B) Alignments of TM3 (A) and TM7 (B) of dinoflagellate ChRs and their  
699 metagenomic homologs. The TCP motif and the Asn residue corresponding to Asp212 of  
700 bacteriorhodopsin are highlighted red. (C) EYFP tag fluorescence in cells expressing *mgdChR1*  
701 constructs schematically shown on top of the images. TS, trafficking signal, ER, endoplasmic  
702 reticulum export motif.

703 **Figure S4.** Alignment of *S. microadriaticum* ChR1 with and without the N-terminal extension.

### 704 **Supplemental Table Legends**

705 **Table S1.** Compositions of the solutions used in patch clamp recording.

706 **Table S2.** List of cryptophyte strains analyzed.

### 707 **Supplemental Data Set Legends**

708 **Data Set S1.** Genbank accession numbers, abbreviated protein names, source organisms,  
709 habitats, transcript names and amino acid sequences used to construct the phylogenetic tree in  
710 Fig. 1. Note that only sequences that cover the entire N-terminal and rhodopsin domains are  
711 included. Literature references to identification and electrophysiological characterization of the  
712 sequences are also provided. The sequences identified and characterized in this study are  
713 shown in bold.

714 **Data Set S2.** A Newick file of the tree shown in Fig. 1 in the main text.

715 **Data Set S3.** An alignment of the C-truncated sequences used to construct the tree in Fig. 1 in  
716 the main text.

717 **Data Set S4.** A list of sequence databases searched.

718

719 **Table S1.** Solution compositions in AxoPatch and SyncroPatch recordings.

720 Abbreviations: Asp, aspartate; EGTA, ethylene glycol tetraacetic acid; HEPES, 4-(2-  
 721 hydroxyethyl)-1-piperazineethanesulfonic acid; LJP, liquid junction potential; NMDG, N-Methyl-  
 722 D-glucamine. All concentrations are in mM.

|                                      | NaCl | KCl | CsCl | CsF | CaCl <sub>2</sub> | MgCl <sub>2</sub> | EGTA | HEPES | NMDG* | Glucose | NaAsp | pH  | LJP<br>mV |
|--------------------------------------|------|-----|------|-----|-------------------|-------------------|------|-------|-------|---------|-------|-----|-----------|
| <b>Pipette standard</b>              | —    | 126 |      |     | 0.5               | 2                 | 5    | 25    | —     | —       | —     | 7.4 | —         |
| <b>Pipette NaCl</b>                  | 126  | —   |      |     | 0.5               | 2                 | 5    | 25    | —     | —       | —     | 7.4 | —         |
| <b>Bath standard</b>                 | 150  | —   |      |     | 1.8               | 1                 | —    | 10    | —     | 5       | —     | 7.4 | 1.1       |
| <b>Bath NaAsp</b>                    | —    | —   |      |     | 1.8               | 1                 | —    | 10    | —     | 5       | 150   | 7.4 | -13       |
| <b>Bath pH 6.4</b>                   | 150  | —   |      |     | 1.8               | 1                 | —    | 10    | —     | 5       | —     | 6.4 | 1.1       |
| <b>Bath NMDG</b>                     | 1.4  | —   |      |     | 1.8               | 1                 | —    | 10    | 148.6 | 5       | —     | 7.4 | 7         |
| <b>Nanion Internal CsF</b>           | 10   | —   | 10   | 110 | —                 | —                 | 10   | 10    | —     | —       | —     | 7.2 | —         |
| <b>Nanion External Chip Fill</b>     | 140  | 4   | —    | —   | —                 | —                 | —    | 10    | —     | 5       | —     | 7.4 | —         |
| <b>Nanion External Physiological</b> | 140  | 4   | —    | —   | 2                 | 1                 | —    | 10    | —     | 5       | —     | 7.4 | —         |
| <b>Nanion External NMDG 60</b>       | 80   | 4   | —    | —   | 2                 | 1                 | —    | 10    | 60    | 5       | —     | 7.4 | —         |

723 \*NMDG stock (pH 9) was prepared from 1M NMDG and ~700 mM HCl.

724 **Table S2.** List of cryptophyte strains analyzed

725 Abbreviations: BEA, Banco Español de Algas, of the Universidad of Las Palmas de Gran Canaria,  
 726 Spain; CCAC, Culture Collection of Algae at the University of Cologne, Germany; SCCAP,  
 727 Scandinavian Culture Collection of Algae and Protozoa at the University of Copenhagen,  
 728 Denmark; CCMP, Culture Collection of Marine Phytoplankton at the Provasoli-Guillard National  
 729 Center for Marine Algae and Microbiota at Woods Hole Oceanographic Institution, USA; NIES,  
 730 National Institute for Environmental Studies, Tsukuba, Japan.

|     | Catalog number | Genus and species names              | Habitat (growth medium) | ACRs found?     |
|-----|----------------|--------------------------------------|-------------------------|-----------------|
| 1.  | CCMP 0268      | <i>Chroomonas sp.</i>                | Marine (ASP-12)*        | No <sup>#</sup> |
| 2.  | CCAC 4037 B    | <i>Chroomonas sp.</i>                | Marine (ASP-12)*        | No <sup>#</sup> |
| 3.  | NIES 1370      | <i>Chroomonas sp.</i>                | Marine (ASP-12)*        | No <sup>#</sup> |
| 4.  | CCAC 0173 B    | <i>Chroomonas sp.</i>                | Marine (ASP-H)*         | No <sup>#</sup> |
| 5.  | CCAC 1627 B    | <i>Chroomonas sp.</i>                | Marine (ASP-H)*         | Yes             |
| 6.  | CCAC 3782 B    | <i>Chroomonas sp.</i>                | Freshwater              | No <sup>#</sup> |
| 7.  | CCAC 3670 B    | <i>Chroomonas sp.</i>                | Marine (ASP-H)*         | No <sup>#</sup> |
| 8.  | BEA 0199B      | <i>Cryptomonas cf. pyrenoidifera</i> | Freshwater              | No <sup>#</sup> |
| 9.  | CCAC 0108      | <i>Cryptomonas gyropyrenoidosa</i>   | Freshwater              | No <sup>#</sup> |
| 10. | CCAC 0031      | <i>Cryptomonas obovoidea</i>         | Freshwater              | No <sup>#</sup> |
| 11. | CCAC 0064      | <i>Cryptomonas ovata</i>             | Freshwater              | No <sup>#</sup> |
| 12. | SCCAP K0416    | <i>Geminigera sp.</i>                | Marine (ASP-12)*        | No <sup>#</sup> |
| 13. | CCAC 1074 B    | <i>Komma caudata</i>                 | Freshwater              | No <sup>#</sup> |
| 14. | CCMP 0760      | <i>Rhodomonas sp.</i>                | Marine (ASP-12)*        | Yes             |
| 15. | CCAP 979/6     | <i>Rhodomonas sp.</i>                | Marine (ASP-12)*        | Yes             |
| 16. | CCAC 1480 B    | <i>Rhodomonas sp.</i>                | Freshwater              | Yes             |
| 17. | CCAC 3787 B    | <i>Rhodomonas sp.</i>                | Marine (ASP-12)*        | Yes             |
| 18. | CCAC 3407 B    | <i>Rhodomonas sp.</i>                | Marine (ASP-12)*        | Yes             |
| 19. | CCAC 3799 B    | <i>Rhodomonas sp.</i>                | Marine (ASP-12)*        | Yes             |
| 20. | BEA 0603B      | <i>Urgorri complanatus</i>           | Marine (ASP-12)*        | No <sup>#</sup> |

731 \*For media recipes see the CCAC website (<https://www.uni-due.de/biology/ccac/>)

732 <sup>#</sup>Our finding of no ACR transcripts in this species does not necessarily mean that they are not  
 733 encoded by its genome and expressed; the transcript abundance may simply have been below  
 734 the detection limit of our method.

735

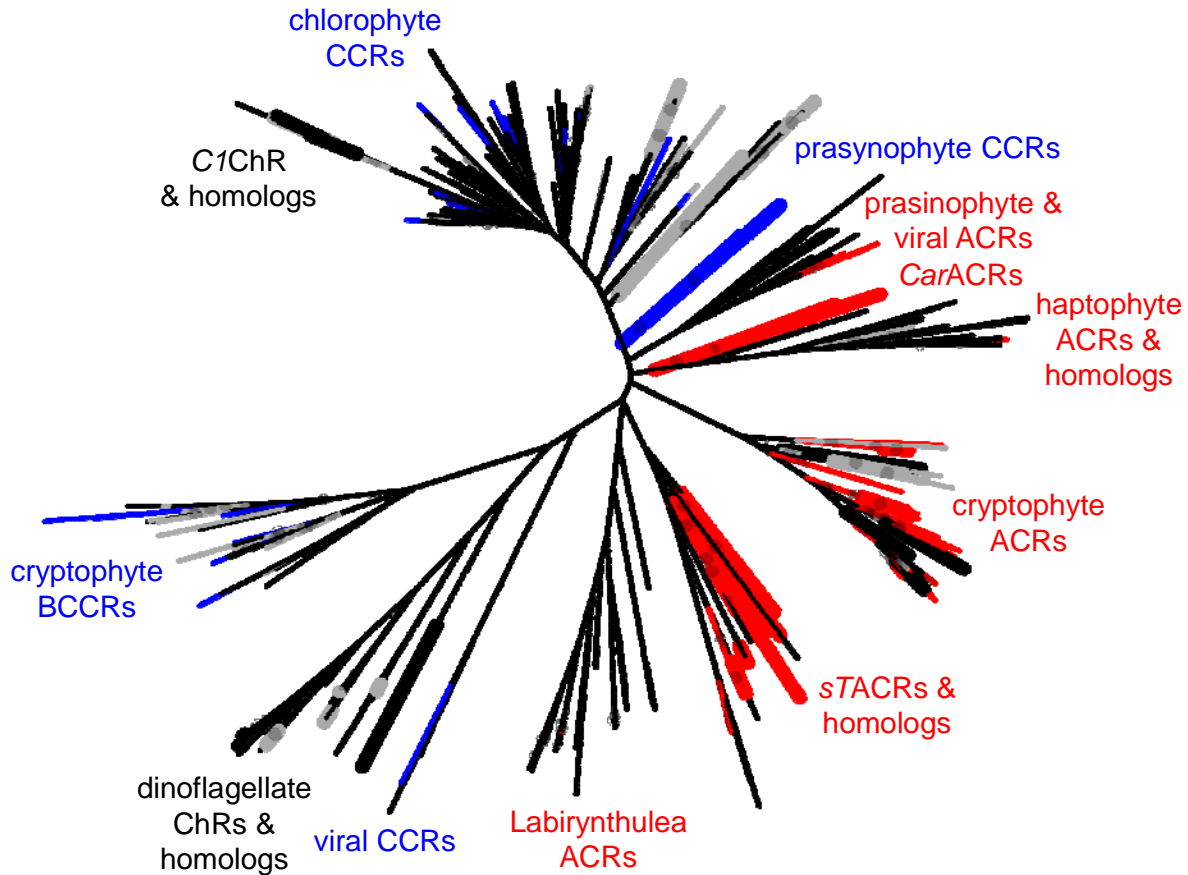

736 **Figure 1.** An unrooted phylogenetic tree of ChRs. The nodes are color-coded as following: red,  
737 confirmed anion selectivity; blue, confirmed cation selectivity; gray, non-functional; black, ion  
738 selectivity not determined. Thicker nodes show ChRs characterized in this study. Gray circles  
739 show ultrafast bootstrap support values above 95%. A tree file in the Newick format is available  
740 as Data Set S2, and the corresponding protein alignment, as Data Set S3.

741

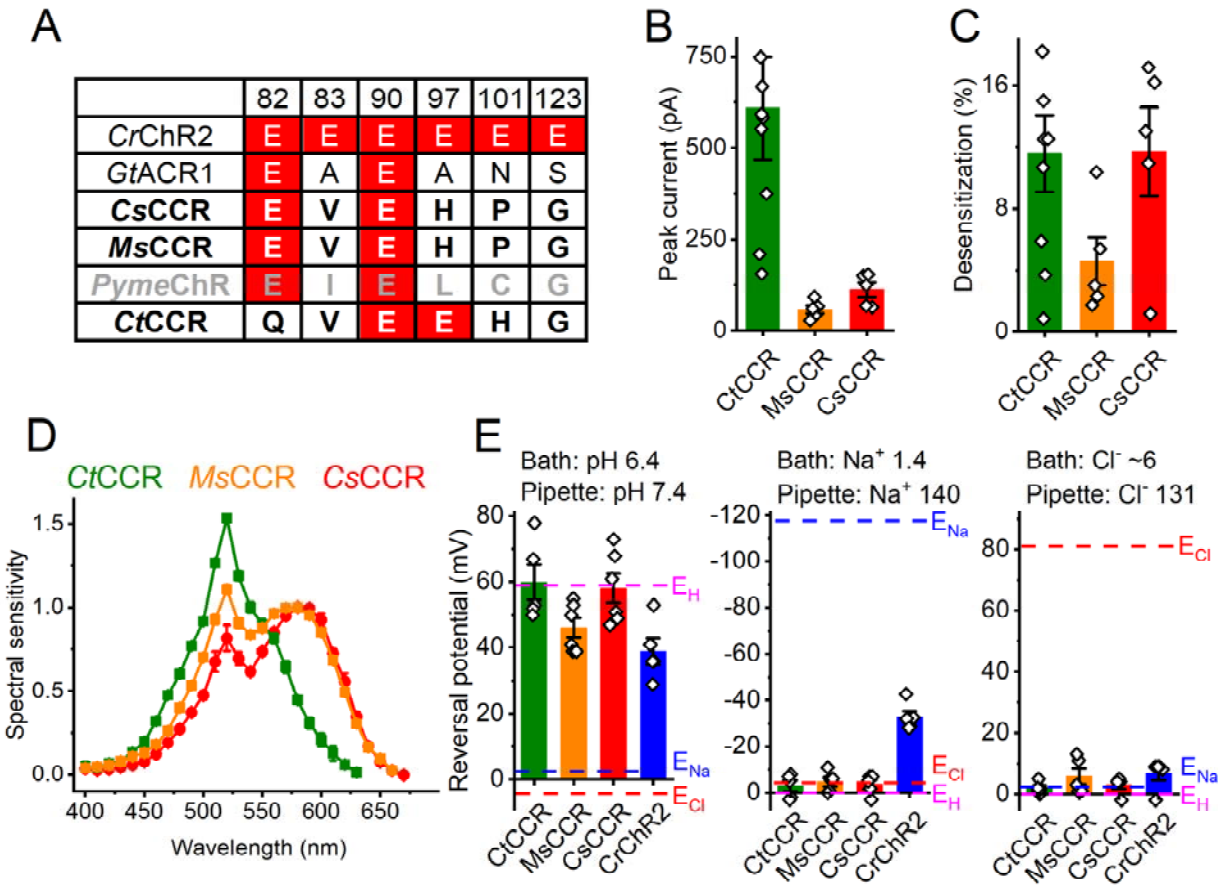

742 **Figure 2.** Prasinophyte CCRs. (A) Amino acid residues corresponding to the indicated positions  
 743 in *CrChR2*. ChRs characterized in this study are in bold (black, functional; gray, non-functional).  
 744 Conserved glutamates are highlighted red. (B) Peak photocurrent amplitudes generated at -60  
 745 mV in response to 1-s light pulses at the wavelength of the spectral maximum. (C)  
 746 Desensitization of photocurrents after 1-s illumination. (D) Action spectra of photocurrents. The  
 747 data points show mean  $\pm$  sem ( $n = 4-8$  scans). (E) Reversal potentials of photocurrents. The bars  
 748 in B, C and E show mean  $\pm$  sem; diamonds, data from individual cells.

749



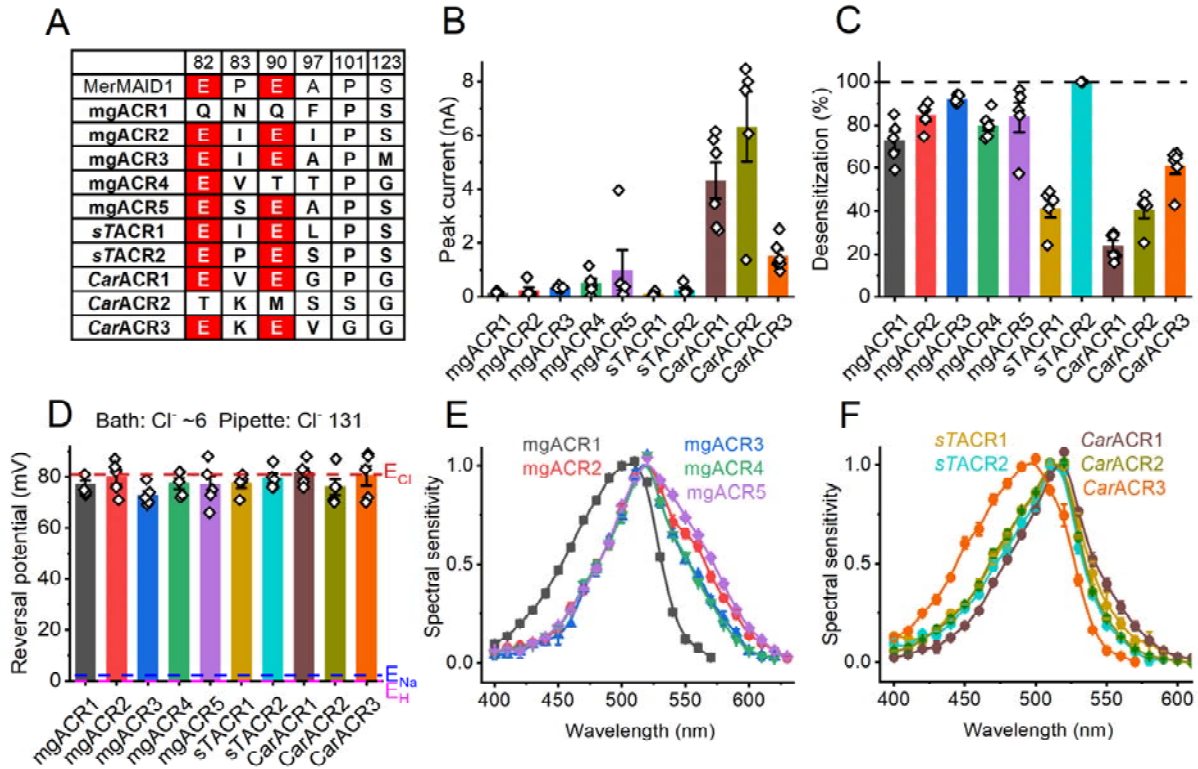

750 **Figure 3.** Stramenopile ACRs and their metagenomic homologs. (A) Amino acid residues in the  
 751 ion conductance pathway, corresponding to the indicated positions in *CrChR2*. ChRs  
 752 characterized in this study are in bold face. Conserved glutamates are highlighted red. (B) Peak  
 753 photocurrent amplitudes generated at -60 mV in response to 1-s light pulses at the wavelength  
 754 of the spectral maximum. (C) Desensitization of photocurrents after 1-s illumination. (D)  
 755 Reversal potentials of photocurrents. In B-D the bars show mean  $\pm$  sem; empty diamonds, data  
 756 from individual cells. (E and F) Action spectra of photocurrents. The data points are mean  $\pm$  sem  
 757 ( $n = 4-6$  scans).

758

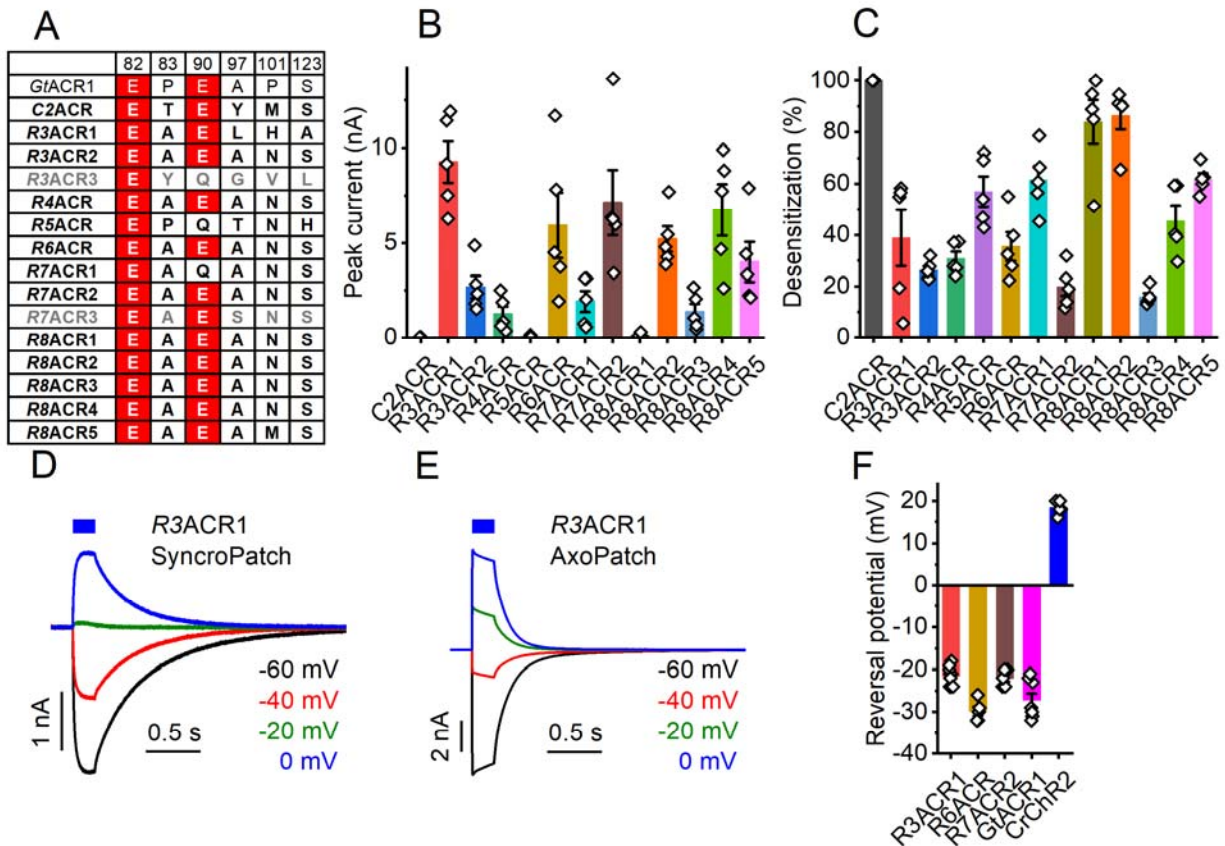

759 **Figure 4.** Cryptophyte ACRs. (A) Amino acid residues corresponding to the indicated positions in  
 760 *CrChR2*. ChRs characterized in this study are in bold, non-functional homologs are in grey.  
 761 Conserved glutamates are highlighted red. (B) Peak photocurrent amplitudes generated at -60  
 762 mV in response to 1-s light pulses at the wavelength of the spectral maximum. (C)  
 763 Desensitization of photocurrents after 1-s illumination. (D and E) Series of photocurrent traces  
 764 recorded from *R3ACR1* upon incremental voltage increase with the SyncroPatch 384i (D) and  
 765 AxoPatch 200B (E) at 470-nm excitation. Note the smaller amplitude and slower kinetics of the  
 766 SyncroPatch traces, as expected from the lower stimulus intensity. (F) Reversal potentials of  
 767 photocurrents. In B, C and F the bars show mean  $\pm$  sem; empty diamonds, data from individual  
 768 cells.

769

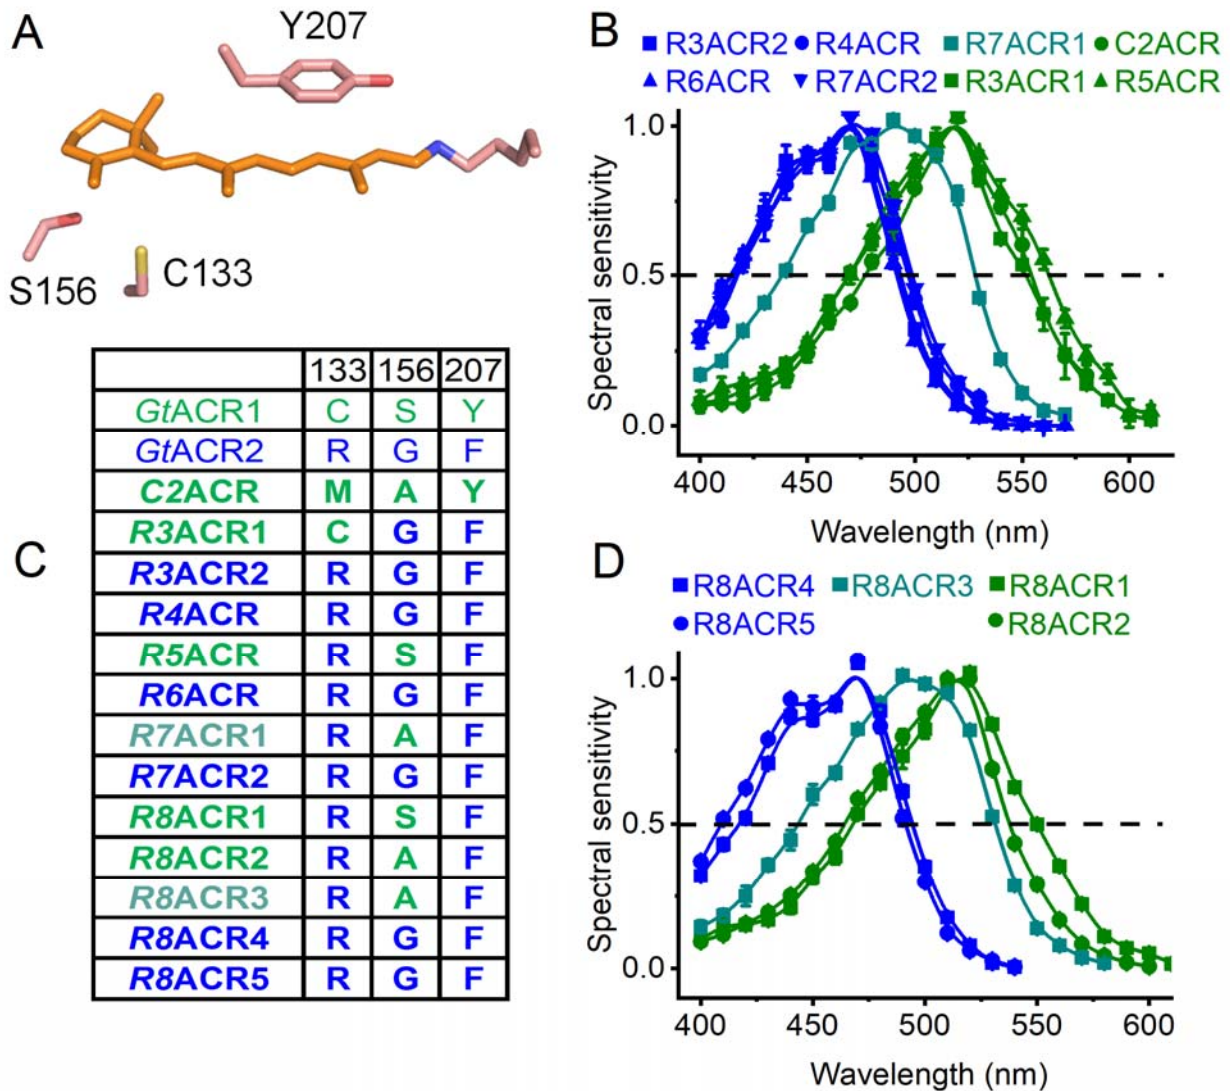

770 **Figure 5.** Color tuning in cryptophyte ACRs. (A) A crystal structure of *GtACR1* (6EDQ) showing  
 771 the three side chains that contribute to the spectral difference between *GtACR1* and *GtACR2*. (B  
 772 and D) Action spectra of photocurrents generated by the indicated cryptophyte ACRs. The data  
 773 points show mean  $\pm$  sem ( $n = 4-8$  scans). (C) Amino acid residues involved in color tuning in the  
 774 functional cryptophyte homologs. The numbering is according to *GtACR1* sequence.

775

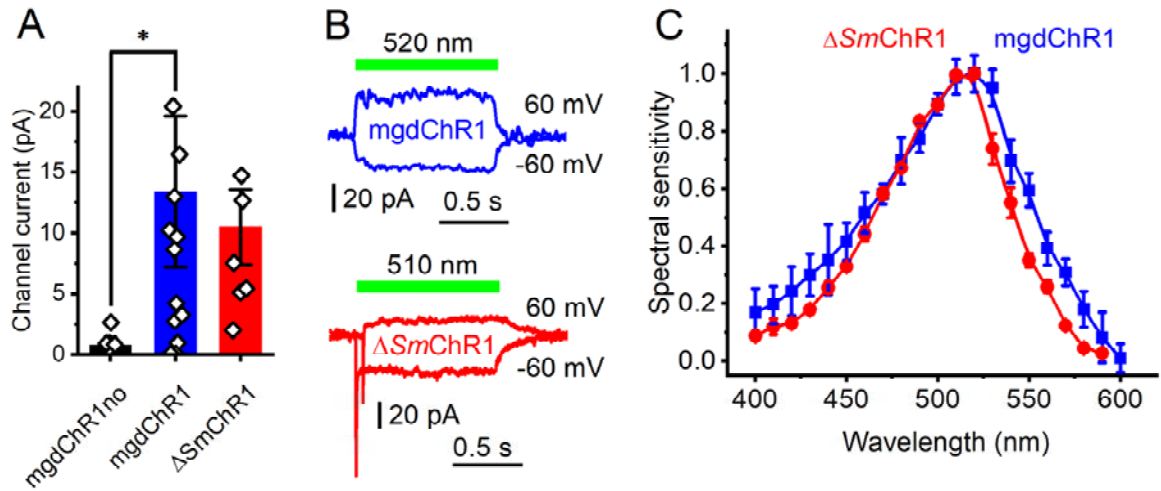

776 **Figure 6.**  $\Delta SmChR1$  and its metagenomic homolog  $mgdChR1$ . (A) Peak photocurrent amplitudes  
777 generated at -60 mV in response to 1-s light pulses at the wavelength of the spectral maximum.  
778 The bars show mean  $\pm$  sem; empty diamonds, data from individual cells. The asterisk indicates  $p$   
779  $< 0.01$  by the Mann-Whitney test. “ $mgdChR1no$ ” denotes the construct without TS and ER  
780 motifs. (B) Photocurrent traces recorded at -60 and 60 mV from  $mgdChR1$  (top) and  $\Delta SmChR1$   
781 (bottom). The  $\Delta SmChR1$  at 60 mV was shifted 50 ms to the right relative to the trace at -60 mV  
782 to show the fast negative peak. (C) Action spectra of photocurrents. The data points show mean  
783  $\pm$  sem ( $n = 10-12$  scans).

784

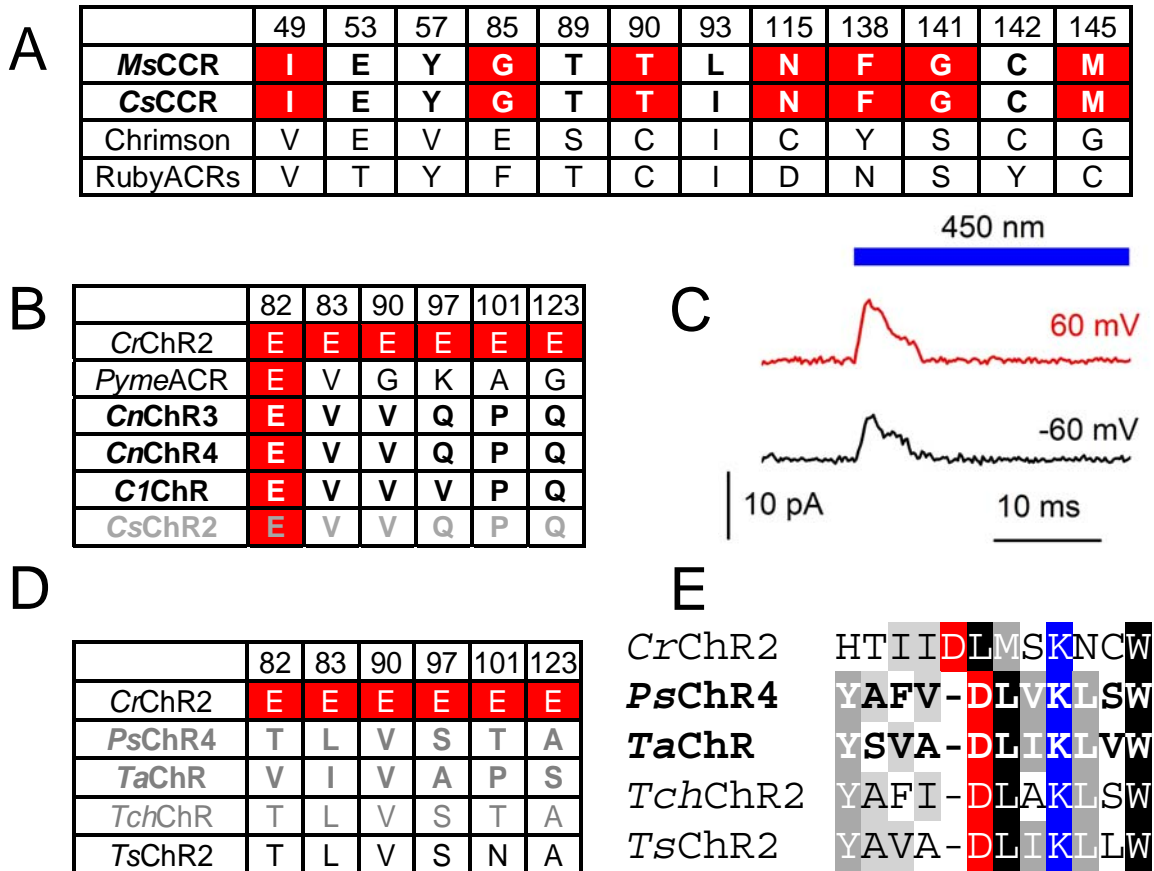

785 **Figure S1.** (A) The residues of the retinal-binding pockets. Variants tested in this study are in  
 786 bold. The residues in *MsCCR* and *CsCCR* that differ from those in *Chrimson* and *RubyACRs*,  
 787 earlier known red-shifted ChRs, are highlighted red. The numbers are according to  
 788 bacteriorhodopsin sequence. (B and D) The residues in the positions of the conserved  
 789 glutamates (highlighted red) in the ion conductance pathway in the indicated homologs from  
 790 Chlorophyceae (B) and Chlorodendrophyceae (D). Variants tested in this study are in bold, non-  
 791 functional, in gray. The numbers are according to *CrChR2* sequence. (C) Photocurrent traces  
 792 recorded from *C1ChR* in response to 1-s illumination at -60 and 60 mV. (E) Alignment of the part  
 793 of TM7 of the indicated Chlorodendrophyceae homologs. The Schiff base Lys is highlighted  
 794 blue; the upstream Glu, red.

795

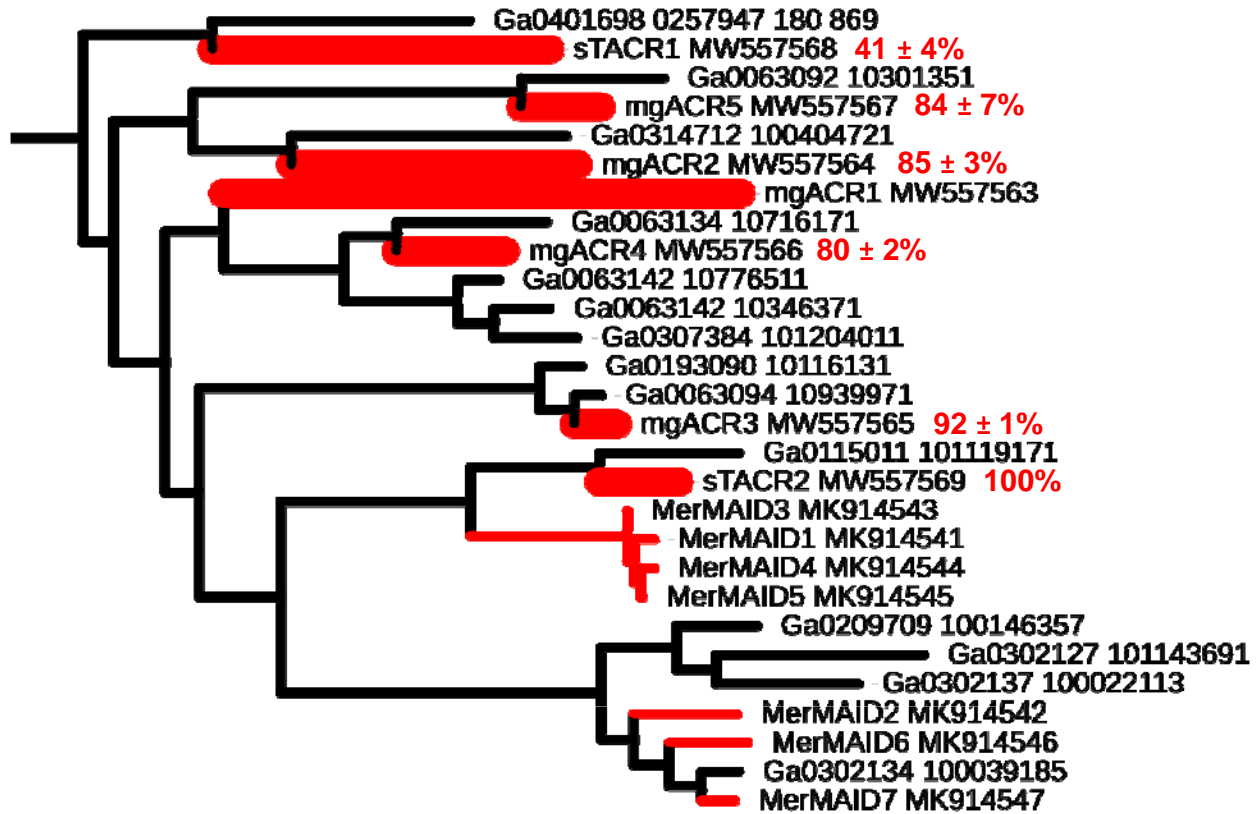

796 **Figure S2.** A section of the phylogenetic tree from Fig. 1 redrawn in a rectangular format. Red  
797 nodes show variants with proven anion selectivity, thicker nodes show variants tested in this  
798 study. Red numbers are the values of photocurrent desensitization from Fig. 3C in the main text  
799 (mean  $\pm$  sem, n = 5-6 cells).

800

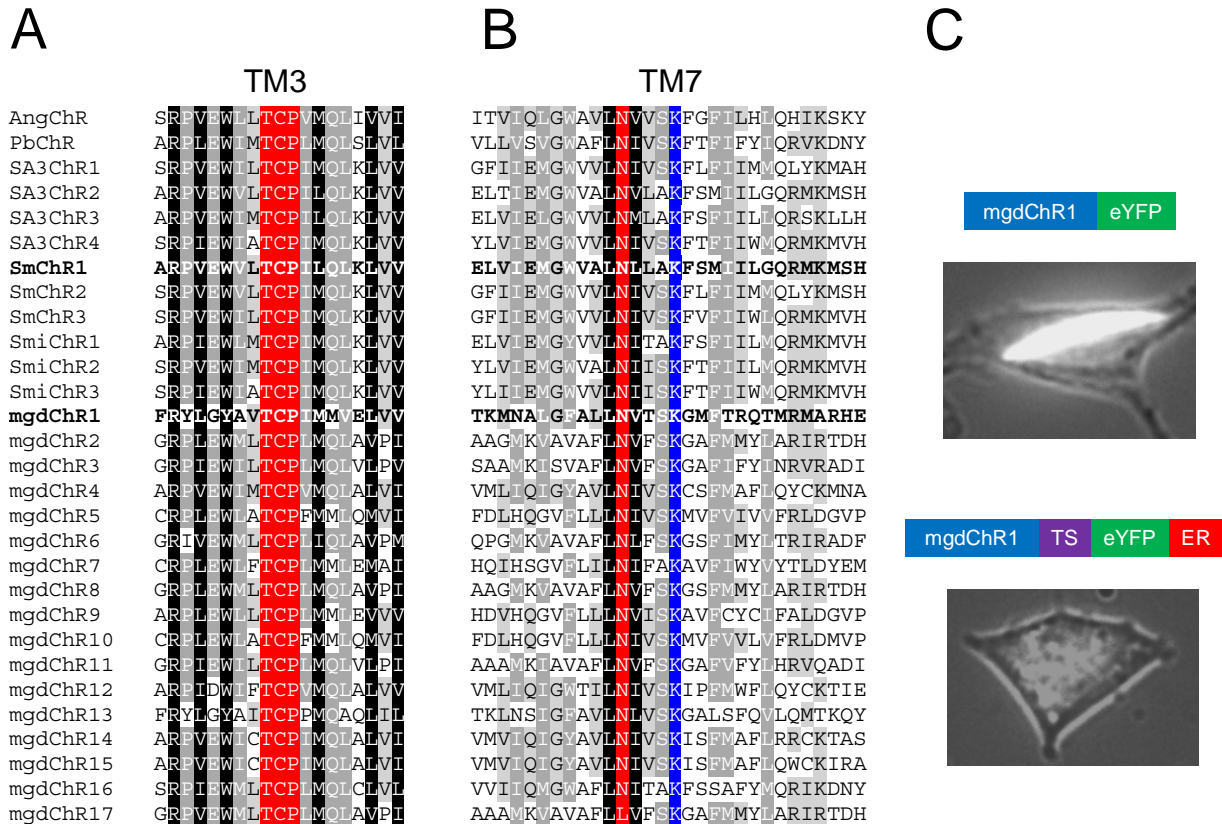

801 **Figure S3.** (A and B) Alignments of TM3 (A) and TM7 (B) of dinoflagellate ChRs and their  
 802 metagenomic homologs. The TCP motif and the Asn residue corresponding to Asp212 of  
 803 bacteriorhodopsin are highlighted red. (C) EYFP tag fluorescence in cells expressing mgdChR1  
 804 constructs schematically shown on top of the images. TS, trafficking signal, ER, endoplasmic  
 805 reticulum export motif.

806

```
SmChR1 MSTEIHIELLHSGGDGLPPGAAGVGAAVVALELDSQRQIFRAEGGRWSTTGCTGDQPPWARADQPAVRLGPSGAFFPGQARNLRFVLDRENQEIIIMYSD 100
ΔSmChR1 -----
SmChR1 NVLMAPAGASEGQLGVPVGGGVCRDYSGGNGSVGCPDKSSPVSVMFLRTVELVVWPEATLEIRRLAVMAPAGYWQLSHSTRSAPVHHRPTPTPCHAAACR 200
ΔSmChR1 -----
SmChR1 ACCQYPLAACDPDRKKGSCSMGGVVLHACRAHSATELSLRTISPCCWTVRCRTEAIAIHTMEHMGTRAVQNALDMEQGRLSEAMAMIQDSMDRVRRLQT 300
ΔSmChR1 -----MDRVRRLQT 9
SmChR1 ETCDSVDWSDAHNIAQIAQGTFLFLILAIWLIFANNAKVAVGQKAPLEQRHAVCATLSTAVALFSGFFNIMQLTGIDDFDIPGYSGGFVLQARPVVEWVLT 400
ΔSmChR1 ETCDSVDWSDAHNIAQIAQGTFLFLILAIWLIFANNAKVAVGQKAPLEQRHAVCATLSTAVALFSGFFNIMQLTGIDDFDIPGYSGGFVLQARPVVEWVLT 109
SmChR1 CPILQLKLVLAGARVPSYRRFMMPLLSAAVLLCGVAATFTEGALRYVWTFGSIFCFIMFYHNALQIGENSEGEESLLRGDSYRRLTLLLIITWFPPP 500
ΔSmChR1 CPILQLKLVLAGARVPSYRRFMMPLLSAAVLLCGVAATFTEGALRYVWTFGSIFCFIMFYHNALQIGENSEGEESLLRGDSYRRLTLLLIITWFPPP 209
SmChR1 IWFILSPEGFNLVDSELVIEMGWVALNLLAKFSMIILGQRMKMSHQKMEAAARELYGMAPGDAVSGEALDQKALAESSTKGRRMMPADYGLGVGEDAE 600
ΔSmChR1 IWFILSPEGFNLVDSELVIEMGWVALNLLAKFSMIILGQRMKMSHQKMEAAARELYGMAPGDAVSGEALDQKALAESSTKGRRMMPADYGLGVGEDAE 309
```

807 **Figure S4.** Alignment of *S. microadriaticum* ChR1 with and without the N-terminal extension.
